1  
2  
3  
4  
5  
6  
7  
8  
9  
10  
11  
12  
13  
14  
15  
16  
17  
18  
19  
20  
21  
22  
23  
24  
25  
26  
27  
28  
29  
30  
31  
32  
33  
34  
35  
36  
37  
38  
39  
40  
41  
42  
43  
44  
45  
46

**Mammalian musculoskeletal regeneration is associated with reduced inflammatory cytokines and an influx of T cells.**

Thomas R. Gawriluk<sup>1,\*</sup>, Jennifer Simkin<sup>2</sup>, Corin K. Hacker<sup>1</sup>, John M. Kimani<sup>3</sup>, Stephen G. Kiama<sup>3</sup>, Vanessa O. Ezenwa<sup>4,5</sup>, and Ashley W. Seifert<sup>1,3,\*</sup>

*<sup>1</sup>Department of Biology, University of Kentucky, Lexington, KY, 40506 USA.*

*<sup>2</sup>Department of Orthopedics, Louisiana State University Health Sciences Center, New Orleans, LA, 70112 USA.*

*<sup>3</sup>Department of Veterinary Anatomy and Physiology, University of Nairobi, Nairobi, Kenya.*

*<sup>4</sup>Odom School of Ecology, University of Georgia, Athens, GA, 30602 USA.*

*<sup>5</sup>Department of Infectious Disease, College of Veterinary Medicine, University of Georgia, Athens, GA, 30602 USA.*

**Correspondence:**

Thomas R. Gawriluk: [tgawriluk@uky.edu](mailto:tgawriluk@uky.edu)

Ashley W. Seifert: [awseifert@uky.edu](mailto:awseifert@uky.edu)

47 **ABSTRACT**

48           Whether the immune response to injury contributes to tissue regeneration is not well  
49 understood. We quantified systemic and local cytokines during ear pinna repair to provide the  
50 first comprehensive comparison of the immune response to injury between mammalian  
51 regeneration (*A. cahirinus* and *A. percivali*) and fibrotic repair (*M. musculus*). Importantly, by  
52 comparing laboratory-reared and wild-caught animals we identified responses specifically  
53 associated with healing outcome. Fibrotic repair showed a greater local release of IL-6, CCL2  
54 and CXCL1. Conversely, regeneration showed decreased circulating IL-5, IL-6, IL-17, CCL3  
55 and CXCL1 and increased local IL-12 and IL-17. The differential IL-6 response was  
56 substantiated by increased pSTAT3 during the inflammatory phase of fibrotic repair and with  
57 blastema formation and tissue morphogenesis in *Acomys*. COX-2 inhibition was not sufficient to  
58 induce regeneration. Interestingly, a unique influx of lymphocytes was coupled with  
59 regeneration and RNA-expression analysis suggested they were regulatory T cells. Together, the  
60 data support regeneration-specific inflammation and T cell responses in *Acomys*.

61

62 **Keywords:** spiny mouse, *Acomys*, immune response, regeneration, blastema, inflammation, T  
63 cell, wild animal

## 64 INTRODUCTION

65 Epimorphic regeneration in response to tissue damage occurs as a chronological and  
66 overlapping series of processes that includes hemostasis, inflammation, re-epithelialization,  
67 activation of local progenitor cells, tissue morphogenesis, and replacement of the injured tissue.  
68 The outcome of these processes is scar-free healing. In contrast, most human injuries heal by  
69 fibrotic repair, which is characterized by limited cellular proliferation and intense collagen  
70 deposition that results in a scar repairing the damaged tissue [1]. As with any trauma or infection  
71 that disrupts tissue architecture, regeneration and fibrotic repair are concomitant with a  
72 multiphasic immune response that promotes hemostasis, creates inflammation, protects against  
73 microbial infection, initiates re-epithelialization, and stimulates a local fibrotic response [2].  
74 During most instances of regeneration (e.g., limb, fin, digit tip, etc.) there is an apparent  
75 resolution of acute inflammation that coincides with the accumulation of resident cells, which  
76 subsequently re-enter the cell cycle and self-organize to undergo morphogenesis [3, 4]. This  
77 transition from an inflammatory environment to morphogenesis is synonymous with regenerative  
78 blastema formation [5]. As such, the injured tissue must precisely coordinate dynamic  
79 interactions between cells and factors (i.e., cytokines, chemokines, growth factors etc.) within the  
80 injury microenvironment to resolve the inflammatory response and promote blastema formation.

81 Despite a rich literature describing the effects of immune cells and their products in non-  
82 regenerating wounds [6, 7], our knowledge of the immune response during epimorphic  
83 regeneration remains poor [8-10]. Recent studies in fish, frogs, salamanders, and spiny mice  
84 support that immune cells and their products are required for blastema formation and successful  
85 regeneration. For instance, complete or timed depletion of macrophages or regulatory T cells  
86 (T<sub>REG</sub>) prevents re-epithelialization and subsequent blastema formation [11-18] and blocking

87 reactive oxygen species (ROS) production elicits a similar outcome [19-21]. Perhaps not  
88 unexpectedly, similar experiments in non-regenerating systems cause incomplete wound closure  
89 and angiogenesis, suggesting that the same immune signals initiate fibrotic repair and  
90 regeneration [22-27]. Moreover, comparing the immune response to injury between fetal and  
91 adult mammals [28-30], pre- and post-metamorphic amphibians [31-33], closely-related  
92 regenerating and non-regenerating vertebrates [34], and regeneration-competent and scarring  
93 tissues in the same animal [35-37] all support that reduced inflammation and a muted immune  
94 response promotes epimorphic regeneration over fibrotic repair. However, an important series of  
95 studies support the idea that some immune cells are passive participants during tissue  
96 regeneration. For example, removal of the spleen [38], or induction of leukopenia [39] during  
97 newt limb regeneration demonstrate that a severely reduced leukocyte response does not prevent  
98 blastema formation or regeneration.

99         These contrasting viewpoints raise several unanswered questions. (1) Are there specific  
100 factors produced by immune cells that polarize local cell phenotypes and specifically promote  
101 regeneration or fibrotic repair? (2) Does the inflammatory response impede blastema formation  
102 and subsequent regeneration in adult mammals? (3) Are the initial stages of fibrotic repair and  
103 regeneration driven by different immune responses, such that altering the immune response  
104 could stimulate regeneration in lieu of fibrotic repair? In order to address these questions and to  
105 test how immune cell factors specifically affect resident cells in injured tissue, there is a need to  
106 establish the timing and extent to which these factors are deployed during regeneration and  
107 fibrotic repair.

108         In this study, we provide insight of the immune mechanisms that coincide with  
109 mammalian regeneration by following-up on the relatively recent discovery that multiple species

110 of spiny mice (e.g., *Acomys cahirinus*, *A. percivali*, *A. kempfi*) regenerate skin and  
111 musculoskeletal tissue [15, 40-42]. Previous work in spiny mice supports that epimorphic  
112 regeneration is associated with resident cell activation, cell cycle progression, cell proliferation,  
113 and an inflammatory response distinguished by a prolonged signature of NADPH-oxidase-  
114 derived ROS [15, 40, 42]. Additionally, macrophages are required for blastema formation in  
115 spiny mice [15], and there is additional evidence that macrophage subtypes differentially drive  
116 regeneration or fibrotic repair in rodents [15-17]. Therefore, we sought to characterize and  
117 compare the cytokine response to injury during fibrotic repair and regeneration to specifically  
118 test if the immediate immune response to injury is different between these two healing outcomes.

119 We compared the injury response using a 4 mm ear punch assay among three species (*A.*  
120 *cahirinus*, *A. percivali* and *M. musculus*) and two source populations (wild-caught *A. percivali*  
121 and *M. musculus*, and laboratory-reared *A. cahirinus* and *M. musculus*) using a panel of sixteen  
122 cytokines. Our results showed that injury across all groups induced a common set of pro-  
123 inflammatory cytokines (IL-1 $\beta$ , IL-6, TNF $\alpha$ ) and leukocyte chemotactic factors (GM-CSF/CSF2,  
124 and MIP-1 $\alpha$ /CCL3) with a similar timed resolution, supporting that some signals of acute  
125 inflammation are a shared feature of regeneration and fibrotic repair. Supporting a difference  
126 between regeneration and fibrotic repair, we observed differential responses for several pro-  
127 inflammatory cytokines during the acute inflammatory phase. Surprisingly, we found a faster,  
128 stronger and prolonged adaptive immune response characterized by T cell influx during  
129 regeneration.

130

131 **RESULTS**

132 **Cross-species validation of cytokine detection in rodent serum and tissue**

133 To begin characterizing the mammalian immune response during epimorphic  
134 regeneration, we analyzed sixteen cytokines (Interleukin 1-alpha (IL-1 $\alpha$ ), IL-1 $\beta$ , IL-2, IL-4, IL-5,  
135 IL-6, IL-10, IL-12p70, IL-17, chemokine (C-C motif) ligand 2 (CCL2) (a.k.a. monocyte  
136 chemoattractant protein 1 or MCP-1), CCL3 (a.k.a. macrophage inflammatory protein 1 $\alpha$  or  
137 MIP-1 $\alpha$ ), CCL5 (a.k.a. regulated on activation, normal T cell expressed and secreted or  
138 RANTES), colony-stimulating factor 2 (CSF2) (a.k.a. granulocyte-macrophage colony-  
139 stimulatory factor or GM-CSF), tumor necrosis factor-alpha (TNF $\alpha$ ), interferon-gamma (IFN $\gamma$ )  
140 and chemokine (C-X-C motif) ligand 1 (CXCL1) (a.k.a. KC)) using a custom-designed sandwich  
141 ELISA array. We used this assay to compare five groups: three at the University of Kentucky,  
142 (1) laboratory-reared, outbred *Mus musculus* (Mm-UKY), (2) wild-caught *M. musculus* (Mm-  
143 Wild), (3) laboratory-reared *Acomys cahirinus* (Ac), and two at the University of Nairobi, (4)  
144 outbred *M. musculus* reared by a local breeder (Mm-Kenya) and (5) wild-caught *A. percivali*  
145 (Ap). Our experimental design allowed us to compare cytokine responses between regenerating  
146 and non-regenerating species (Ac and Ap compared to Mm-UKY, Mm-Kenya and Mm-Wild),  
147 and between immune-challenged and laboratory-reared animals (Mm-Kenya, Mm-Wild and Ap  
148 compared to Mm-UKY and Ac).

149 Parallelism analysis showed comparable slopes between *Mus* and *Acomys* serum and  
150 tissue samples with the mouse standard curve for a majority of cytokines (Table 1 and  
151 Supplementary Figure 1). Given non-parallel slopes, we did not validate using this assay to  
152 compare IL-10 or CCL5 between species (Figure S1). Several cytokines not present in *Acomys*  
153 serum were quantified in tissue lysate (Ac: IL-1 $\beta$ , IL-4, IL-6, IL-17, CSF2, CCL2; Ap: IL-17,

154 CSF2, CXCL1) supporting that the serum concentration was below the limit of detection and that  
155 the antibody binding epitopes were conserved between species. Therefore, if the cytokine was  
156 detected in one tissue source or one *Acomys* species, we concluded it could be detected in the  
157 other source or species. This provided us with a way to determine if the cytokine was present or  
158 absent. A comparison of full-length predicted amino acid sequences between *A. cahirinus* and  
159 *M. musculus* indicated conservation—minimum of 56.8% (IFN $\gamma$ ) to a maximum of 95.8%  
160 (TNF $\alpha$ ) (Table 2 and Supplemental Figure 2A-Q). Given that CXCL1 was the only cytokine not  
161 detected in the Ac samples, this supports that it was likely not being present versus a failure to  
162 detect it. Together, these results supported that the ELISA could be used to directly compare  
163 changes in most of the cytokines between species.

164

### 165 **Fibrotic repair is associated with elevated amounts of circulating IL-5, IL-6 and CCL3.**

166 Using our cytokine assay, we first compared circulating serum cytokine concentrations  
167 from uninjured animals among groups (species and source population) to establish a systemic  
168 baseline for each group (Figure 1A). A total of 13 cytokines were compared as CSF2 was not  
169 present in the serum of any species. While many baseline concentrations were similar between  
170 groups, immune-challenged animals (i.e., wild) exhibited higher IL-4, IL-6, CCL2, and TNF $\alpha$   
171 compared to laboratory-reared animals (Figure 1A). Interestingly, the Mm-Kenya animals were  
172 a transitional group between Mm-UKY and Mm-Wild for TNF $\alpha$  and IL-4 (Figure 1A).  
173 Heightened concentrations of IL-6, TNF $\alpha$  and IL-4 support previous pathogen exposure and a  
174 possibility of current infection [43, 44]. Thus, Mm-Kenya, Mm-Wild and Ap had a relatively  
175 activated immune system, while Mm-UKY and Ac possessed a more naïve immune system [45].  
176 There were no consistent differences between regenerators and non-regenerators (Figure 1A).

177           Next, we quantified the systemic injury response for each cytokine compared to its  
178 baseline, beginning 24 hr (D1) after injury and over the next twenty days (Figure 1B). In most  
179 cases (except IL-2, IL-6, IL-17 and CXCL1), there was no effect of day (Supplemental Table 2),  
180 indicating that the immediate systemic response persisted for 20 days. Animals with a more  
181 naïve immune system showed increased IL-2 and TNF $\alpha$ , and decreased IL-1 $\alpha$  compared to a  
182 relatively activated immune system (Figure 1B: solid lines compared to intermittent lines and  
183 Supplemental Data File). Regeneration showed decreased IL-5, IL-6, IL-17, CCL3 and CXCL1  
184 compared to fibrotic repair (Figure 1B: red lines compared to black lines and Supplemental Data  
185 File). This latter result supported that animals healing by fibrotic repair and regeneration could  
186 be separated by their systemic response to injury.

187

188 **A regenerative microenvironment is marked by induction of T-cell-associated cytokines**  
189 **and a dampened pro-inflammatory cytokine response.**

190           Resident cells and infiltrating immune cells secrete cytokines that likely polarize the  
191 injury microenvironment to support regeneration or fibrotic repair [12, 13, 15, 16, 34, 46, 47].  
192 Thus, to quantify local cytokine concentrations we assayed tissue lysate collected throughout the  
193 healing response. IL-1 $\alpha$  could not be compared because baseline concentrations were above the  
194 upper limit of quantification in more than 80% of samples, indicating that IL-1 $\alpha$  in the ear pinna  
195 was at least two orders of magnitude greater than the other cytokines measured. Although ear  
196 pinna tissue is structurally similar across species [40], local cytokines in *Acomys* were  
197 consistently detected at lower concentrations compared to *M. musculus*. Moreover, because the  
198 concentration of cytokine may not be as important as the dynamics of the cytokine, we compared  
199 the change in cytokine compared to baseline over 20 days (Figure 2). Injury elicited significant



200 changes over time compared to baseline for all cytokines measured in tissue lysate supporting a  
201 dynamic response (Supplemental Table 3). Furthermore, while most cytokines shared similar  
202 trajectories over time, there was an effect of Group and the Group\*Day interaction for all  
203 cytokines supporting significant differences in the magnitude of change among the groups  
204 (Figure 2 and Supplemental Table 3). Supporting an inflammatory response in all groups,  
205 several pro-inflammatory cytokines (IL-6, TNF $\alpha$ ) and myeloid chemotactic factors (CCL3, CSF2  
206 and CXCL1) showed an increase compared to baseline between D1 and D3 that then decreased  
207 to baseline or below between D5 and D20 (Figure 2). There was also an overall decrease  
208 compared to baseline for IL-5 and a small but significant change from baseline for IL-2 and IL-4  
209 across all groups (Figure 2). Animals with naïve immune responses had a stronger increase in  
210 CCL3 and a smaller increase for CCL2 and CXCL1 compared to activated immune responses  
211 (Figure 2: solid compared to intermittent lines). We also identified several cytokines that  
212 showed differential changes between regeneration and fibrotic repair that we describe below  
213 (Figure 2: red compared to black lines).

214 During the acute inflammatory phase (D1 and D2), CCL2 and CXCL1 were increased 9  
215 and 12-fold during fibrotic repair compared to regeneration, respectively (Figure 3). IL-6  
216 showed a similar result at D2 where Mm-UKY, Mm-Kenya and Mm-Wild were increased 10-  
217 fold compared to Ac and Ap (Figure 3). Additionally, IL-17 was increased in Ap, but decreased  
218 in Mm-UKY and Mm-Kenya and IL-12 was increased in Ap compared to all *Mus* (Figure 3).  
219 Interestingly, the TNF $\alpha$  response—a biomarker of inflammation—could not reliably separate  
220 fibrotic repair and regeneration (Figure 3).

221 Regardless of healing outcome, re-epithelialization occurs by D10 [40, 42] coincident  
222 with resolution of many pro-inflammatory cytokine responses (Figure 1B and 2: yellow bars).

223 While there were some differences among groups for the timing of resolution, IL-1 $\beta$ , TNF $\alpha$ , and  
224 CCL2 were similar to or below baseline at D10 for each species (Figure 3). IL-6 also followed  
225 this pattern; however, there was a differential response where Ac remained elevated through D20  
226 while all other species decreased below baseline (Figure 3).

227 At D20, during tissue morphogenesis, the only cytokines that showed a differential  
228 response were IL-12 and IL-17 that were increased during regeneration compared to fibrotic  
229 repair (Figure 3). The anti-inflammatory cytokine IL-4 did not differ over time with respect to  
230 regenerative ability, suggesting that the differences in pro-inflammatory cytokine release is likely  
231 not an IL-4 mediated response. Our results suggest that subtle differences in how cytokines are  
232 deployed in the injury microenvironment can distinguish regeneration or fibrotic repair. These  
233 data suggest that strong, acute increases in the pro-inflammatory cytokines IL-6, CCL2 and  
234 CXCL1 are associated with fibrosis, while the release of IL-12 and IL-17 during tissue  
235 morphogenesis is associated with regeneration.

236

### 237 **Regeneration is associated with an early burst of T cell influx to the injury site.**

238 The release of IL-12 and IL-17 into the regenerative microenvironment suggested  
239 enhanced T cell activation during regeneration [48, 49]. Therefore, we quantified T cell influx  
240 into uninjured and healing tissue from our laboratory populations of *Mus* (Mm-UKY) and  
241 *Acomys* (Ac) using flow cytometry with an antibody to the extracellular portion of the T cell  
242 marker CD3. We observed significant differences in CD3<sup>+</sup> cells in injured tissue between  
243 species over time (two-way ANOVA, n=57; species: Df=1, F=49.49  $P < 0.001$ ; day: Df=6,  
244 F=89.07,  $P < 0.001$ ; species\*day: Df=6, F=21.49  $P < 0.001$ ) (Figure 4A). In uninjured tissue,  
245 Mm-UKY had 10-times more CD3<sup>+</sup> cells compared to Ac (Tukey-Kramer HSD post-hoc test,

246 Df=6,  $t=6.21$ ,  $P<0.001$ ) (Figure 4A). While the total number of CD3<sup>+</sup> cells that infiltrated the  
247 wound was higher in Mm-UKY compared to Ac, there was a greater fold change relative to D0  
248 for CD3<sup>+</sup> cells during regeneration compared to fibrotic repair (Figure 4B). Ac exhibited a  
249 monophasic response to injury starting on D1 with a 78-fold influx of T cells that peaked on D3  
250 and remained above baseline at D15. Mm-UKY showed a biphasic response with peak influx of  
251 10-fold at D7 that returned to baseline at D15 (Figure 4B). Importantly, at D15, when IL-12 was  
252 increased (Figure 2), the influx of CD3<sup>+</sup> cells remained high in Ac compared to Mm-UKY  
253 (Figure 4B).

254 We next used immunohistochemistry with an antibody specific to the intracellular portion  
255 of the CD3 receptor to assess the spatial distribution of T cells during acute inflammation and  
256 morphogenesis (Figure 4C-E). First, these data confirm the greater influx of CD3<sup>+</sup> cells at D5  
257 and D15 in Ac compared to Mm-UKY (Figure 4C-E). Second, in Mm-UKY most CD3<sup>+</sup> cells  
258 were associated with the epidermis and were rarely observed distal to the amputation plane  
259 (Figure 4C). On the other hand, CD3<sup>+</sup> cells in Ac were present in the epidermis and dermis, and  
260 regularly observed in healing tissue distal to the amputation plane (Figure 4E). At D15, CD3<sup>+</sup>  
261 cells were found in the epidermis and dermis of both species (Figure 4D, F). Interestingly,  
262 CD3<sup>+</sup> cells associated with the epidermis in Mm-UKY (Figure 4G) exhibited a spindle-shape  
263 morphology compared to a rounded shape in Ac (Figure 4H). There also appeared to be more  
264 CD3<sup>+</sup> cells in the dermis of Ac compared to Mm-UKY (Figure 4D, F), and the CD3<sup>+</sup> cells  
265 tended to localize near regenerating hair follicles in Ac (Figure 4I). Attempts to characterize  
266 individual T cell phenotypes during regeneration using flow cytometry and IHC using 19  
267 commercially available antibodies, supported significant differences in antibody-epitope binding  
268 between species that prevented further T cell phenotyping by receptor subtype in *Acomys*

269 (Supplemental Table 5). Therefore, we interrogated a comparative injury RNAseq dataset for  
270 differential expression of T cell associated transcripts between *Mus* and *Acomys* [40]. While  
271 expression for genes associated with non-lymphocyte immune cell populations were generally  
272 similar between species, several transcripts associated with T cells and natural killer cells were  
273 increased in *Acomys* and decreased in *Mus* in response to injury (Figure 4J). Increased  
274 expression of *Cd8*, *Ctla4*, *Il2ra*, *Foxp3*, and *Tnfrsf4* specifically suggested an activated cytotoxic  
275 and regulatory T cell response during regeneration but not fibrotic repair (Figure 4J). During  
276 fibrotic repair, *Cd4* was differentially increased at D5 and D10 suggesting the presence of CD4  
277 helper T cells not present during regeneration (Figure 4J). Together, these data demonstrate that  
278 regeneration was associated with a proportionally greater influx of CD3+ cells that accumulate  
279 quickly at the injury site and that specific subtypes of activated T cells were preferentially  
280 associated with regeneration.

281

### 282 **STAT3 is activated independently from IL-6 during blastema formation**

283 We also sought to test our observation that strong induction of the pro-inflammatory  
284 cytokine IL-6 was associated with the acute inflammatory phase of fibrotic repair. To do this,  
285 we assayed for IL-6 signaling using STAT3 phosphorylation (Figure 5A-F). STAT3 is  
286 phosphorylated in response to the ligand IL-6 binding its membrane receptor, which activates  
287 signal transduction in target cells [50]. Corroborating our ELISA quantification for IL-6 in the  
288 tissue microenvironment, we found that pSTAT3 increased 8-fold in response to injury in Mm-  
289 UKY during the acute inflammatory phase (Figure 5A, B). Similarly, during fibrosis when IL-6  
290 concentrations resolved in Mm-UKY, pSTAT3 began to decline toward baseline (Figure 5A, B).  
291 In *Acomys*, pSTAT3 was significantly elevated at D1, although to a lesser extent than compared

292 to Mm-UKY (Figure 5A, B). Moreover, during blastema formation (D10-15) when our ELISA  
293 data showed increased IL-6 compared to baseline in Ac (Figure 3), analysis of pSTAT3 showed  
294 further induction of pSTAT3 in Ac (Figure 5A, B).

295 To determine the cellular localization of STAT3 phosphorylation, we assayed for  
296 pSTAT3 using immunohistochemistry during the acute inflammatory phase (D2) and new tissue  
297 formation (D15) (Figure 5C-F). Supporting the immunoblot data, both species showed extensive  
298 nuclear staining for pSTAT3 at D2 in the epidermis and mesenchymal compartments (Figure  
299 5C', D'). Positive staining in the epidermis > 200  $\mu$ M proximal to the amputation plane  
300 suggested STAT3 activation was a pervasive response to injury within the ear pinna in both  
301 species (Figure 5C, D). Supporting the 2-fold difference in pSTAT3 we observed between Mm-  
302 UKY and Ac (Figure 5A, B), we found that nearly every epidermal cell in Mm-UKY appeared  
303 positive for pSTAT3 whereas less than half of the epidermal cells were positive in Ac (Figure  
304 5C', D'). The internal tissue compartments (e.g., dermis, cartilage, muscle and adipose) at D2  
305 were similar between species with approximately half of the total cells positive for pSTAT3. At  
306 D15, only a few pSTAT3 positive cells were present in Mm-UKY and they were isolated to the  
307 epidermis distal to the amputation plane (Figure 5E, E'). In contrast, pSTAT3 positive cells  
308 were widespread throughout the blastema in Ac (Figure 5F, F'). Together, these data support  
309 stronger IL-6 mediated STAT3 activation in Mm-UKY compared to Ac during the acute  
310 inflammatory phase and increased STAT3 activation during blastema formation.

311 Greater increases in IL-6 and CXCL1 during the acute inflammatory phase of fibrotic  
312 repair in *M. musculus* suggested that these molecules might antagonize a potential regenerative  
313 response. Previous studies have shown that a balance in these molecules regulate wound healing  
314 as IL-6 and CXCL1 are potent pro-inflammatory molecules and hyper-elevated concentrations

315 after injury are attributed to aberrant healing and chronic inflammation [51-53]. Additionally,  
316 genetic ablation of *IL-6*, the *IL-6 receptor*, or the *CXCL1 receptor (CXCR2)*, causes severely  
317 delayed re-epithelialization, scab formation and abhorrent wound healing in cutaneous and  
318 incisional wounds [54-57]. IL-6 signaling activates several downstream mediators of  
319 inflammation including cyclooxygenase-2 (COX-2), and its enzymatic products can amplify the  
320 inflammatory response [58]. To test if COX-2 activity promotes fibrosis in the ear pinna, we  
321 used our ear punch assay in Mm-UKY treated healing tissue with Celecoxib, a specific and  
322 potent COX-2 inhibitor [59] (Figure 6A). Comparing ear-hole closure between celecoxib- and  
323 vehicle-treated animals there was no support for a difference in the rate of closure (D5 through  
324 D30) (repeated measures two-way ANOVA,  $n=31$ ; treatment:  $Df=1$ ,  $F=2.42$ ,  $P=0.137$ ; day:  
325  $Df=5$ ,  $F=179.62$ ,  $P<0.001$ ; treatment\*day:  $Df=5$ ,  $F=0.36$ ,  $P=0.875$ ) (Figure 6B). Similarly,  
326 comparison of ear-hole area at D64 showed no support for a difference between treatment and  
327 control ears (unpaired t-test;  $t=0.671$ ,  $P=0.512$ ) (Figure 6C). One out of five celecoxib-treated  
328 animals had not completed re-epithelialization by D10 (Figure 6D-F). Lastly, while the intensity  
329 of Picrosirius stain appeared to be lower in celecoxib treated animals compared to controls, there  
330 was no difference in the area of collagen deposition at D64 (unpaired t-test,  $t=0.104$ ,  $P=0.918$ )  
331 (Figure 6G-I). Thus, these data support that systemic inhibition of COX-2 activity is not  
332 sufficient to reduce fibrosis or induce a regenerative response after ear pinna injury in *M.*  
333 *musculus*.

## 334 DISCUSSION

335 In this study, we performed a comprehensive cytokine characterization of the immune  
336 response to injury where identical injuries in closely-related species undergo two different  
337 healing responses: regeneration or fibrotic repair. Importantly, our experimental design  
338 leveraged a comparison of animals with an activated and naïve immune system in order to  
339 identify species-specific cytokine changes that were associated with regeneration and not due to  
340 an environment-immunity interaction. Our analyses showed that regardless of healing outcome,  
341 injury induced a common set of pro-inflammatory factors (IL-6, and TNF $\alpha$ ) and chemokines  
342 (CCL3, CSF2 and CXCL1) during the acute inflammatory phase of fibrosis and regeneration.  
343 Additionally, we observed similar responses between healing outcomes for IL-2, IL-4 and IL-5  
344 in the tissue microenvironment. While this supports that fibrotic repair and regeneration share  
345 inflammation during the healing process, we also found significantly greater responses for IL-6,  
346 CCL2 and CXCL1 during fibrotic repair compared to regeneration. In contrast, regeneration was  
347 uniquely associated with local increases in IL-12 and IL-17. Supporting our cytokine analysis,  
348 we found that regeneration was associated with a strong influx of T cells during acute  
349 inflammation compared to fibrotic repair and that regeneration-competent T cells were closely  
350 associated with the dermis during blastema formation. This latter point suggests that T cells may  
351 influence local inflammation and contribute to the local regulation of tissue morphogenesis in  
352 spiny mice.

353 Recent studies comparing immune profiles between laboratory-reared and pet-store or  
354 wild-caught *M. musculus* demonstrate that non-laboratory strains have more CD44<sup>+</sup> effector T  
355 cells, memory T cells and circulating neutrophils [60, 61]. Although neither group directly  
356 measured serum cytokines from the different populations, the elevated baseline concentrations of

357 IL-4, IL-6, CCL2 and TNF $\alpha$  that we measured in circulation from immune-challenged animals  
358 support larger active populations of effector and memory T cells. These data support that our  
359 immune-challenged group have been exposed to more pathogens than the laboratory-reared mice  
360 which is undoubtedly the case. In addition to the increased baseline concentrations of these  
361 cytokines, we also found significant differences in the response to injury for IL-1 $\alpha$ , IL-2 and  
362 TNF $\alpha$  between animals with an activated or naïve immune system. Studying wild-caught  
363 populations enabled us to identify responses that accurately reflected phenotypic differences  
364 between species, rather than differences that could be explained by immune status. Of particular  
365 importance was our inclusion of wild-caught *A. percivali* that indicate increases in TNF $\alpha$ , CCL2  
366 and CXCL1 are not inhibitory to regeneration. Additionally, we observed high variation in  
367 cytokine concentrations across our dataset, indicating that the immune response to injury could  
368 be confounded by individual variation. In other words, researchers should not expect to identify  
369 clear transition phases based on time after injury with small sample sizes. Ultimately these data  
370 support that injury elicits a local cytokine response that is dependent of baseline immune status  
371 with respect to release of cytokines that in turn effects the timing of events but does not change  
372 healing outcome.

373 Acute inflammation is a necessary component of the innate immune response designed to  
374 fight invading microbes by recruiting leukocytes from circulation and activating local myeloid  
375 and lymphoid cells. Our analyses demonstrate that injury induces an acute inflammatory  
376 response regardless of healing outcome that resolves within ~10 days; a timeframe in line with  
377 human and rodent wound healing studies [7, 62]. In particular, we found the local release of  
378 CCL3, CSF2 and CXCL1 in all groups, which are known to be potent chemokines for  
379 monocytes, macrophages and neutrophils. Moreover, the local release of IL-6 and TNF $\alpha$



380 supports the presence of activated macrophages and neutrophils as a common injury response.  
381 Supporting our previous work that neutrophils infiltrate injured spiny mouse tissue slower  
382 compared to laboratory mice [15], regeneration was associated with delayed release and a  
383 reduced maximal fold change in IL-6 and CXCL1 compared to fibrotic repair. Additionally, we  
384 did not detect a CCL2 response during regeneration, and IL-6, CXCL1 and CCL2 are known to  
385 positively regulate the speed of re-epithelialization [54-56], which we find to be delayed at most  
386 five days in *A. cahirinus* compared to *M. musculus* [40]. Thus, while acute inflammation is a  
387 component of regeneration and fibrotic repair, the cellular differences are likely attributed to  
388 reduced pro-inflammatory cytokines released into the microenvironment.

389 Corroborating our observation that the IL-6 response was weaker during regeneration  
390 compared to fibrotic repair, we found diminished activation of STAT3 during acute  
391 inflammation (D1-10) in spiny mouse epidermis compared to mouse. Interestingly, we observed  
392 an increase in pSTAT3 during blastema formation, whereas pSTAT3 levels declined during  
393 fibrotic repair. Furthermore, during tissue morphogenesis at D15 many blastemal cells were  
394 STAT3 positive. Given that IL-6 concentrations did not appreciably increase during blastema  
395 formation or tissue morphogenesis the increase in STAT3 activity is likely independent of IL-6.  
396 STAT3 is activated through multiple pathways (e.g. leukemia inhibitory factor, epidermal  
397 growth factor, palette derived growth factor, IL-10, IL-17, etc.). Although IL-17 increased in *A.*  
398 *percalli* after D10, it did not increase in *A. cahirinus* suggesting it is not responsible for the late  
399 phase of STAT3 phosphorylation. Given that STAT3 signaling is multifaceted, one potential  
400 biological link is that STAT3 activity is necessary for satellite-cell activation and axon  
401 regeneration in mammals [63-65]. Interestingly, the expression of *Sal4*—a factor necessary for  
402 blastema maintenance in *Xenopus* and *Ambystoma*—is regulated by pSTAT3 [66-68]. While

403 *Sal4* does not have a mammalian homolog, this data supports that activation of STAT3 in  
404 regenerating tissue is an evolutionary conserved mechanism and interrogating unique STAT3  
405 targets in spiny mice may uncover mechanisms that regulate blastema formation in mammals.

406 Inhibition of downstream signaling induced by IL-6 / CXCL1, such as arachidonic acid  
407 metabolism by COX-2, has been shown to reduce fibrosis post epidermal injury (e.g. incisional,  
408 cutaneous and chronic pressure wounds) [69-71]. Celecoxib treatment to inhibit COX-2 in the  
409 present study may have slowed re-epithelialization. Additionally, while the total area of fibrosis  
410 was not different between celecoxib- and vehicle-treated animals there appeared to be a small  
411 reduction in the total amount of collagen produced in celecoxib-treated animals from reduced  
412 intensity of picrosirius staining. However, similar to previous reports, reduction in COX-2  
413 activity did not induce regeneration, supporting that inflammation is not the ultimate inhibitory  
414 barrier.

415 In addition to the magnitude increase in IL-6 and CXCL1, our analyses found that  
416 increased local CCL2 was specific to fibrotic repair. CCL2 was first identified as a monocyte-  
417 specific chemoattractant to sites of injury and infection, and activates macrophages [72, 73].  
418 CCL2 also attracts neutrophils and supports neutrophil-dependent tissue damage [72]. As such,  
419 the amount of CCL2 that is released into an injury microenvironment regulates the healing  
420 response and studies support there is a positive relationship between CCL2 and the amount of  
421 fibrosis during fibrotic repair [74-76]. However, a careful balance must be maintained as CCL2  
422 knockout mice do not heal wounds [77]. Thus, it is possible that the reduced IL-6, CCL2 and  
423 CXCL1 responses are responsible for reduced fibrosis in spiny mice. Although these key factors  
424 appear to interact in the hierarchy of the progression of fibrotic repair, the paracrine mechanism

425 of how they would activate dermal fibroblasts remains unknown. It is likely another cell-type,  
426 such as a macrophage or T cell, is mediating the signal.

427 In addition to this study, two studies have quantified cytokines during regeneration—one  
428 in axolotl limbs [12] and the other in spiny mouse dorsal skin wounds [34]. Godwin et al. (2013)  
429 used a mouse cytokine array to analyze regenerating salamander limbs and found that all but two  
430 cytokines detected reached peak amounts within 48hrs of injury and that every cytokine returned  
431 to baseline by D15 after a blastema had formed. Brant et al. (2016) used the same cytokine array  
432 to assess cytokines during the first 14 days of spiny mouse dorsal skin regeneration and observed  
433 a similar phenomenon and all detected cytokines resolve to baseline by D14. Despite study-  
434 specific differences in the ability to detect antigens and a lack of parallelism validation, these  
435 studies support that release of CCL3 and TNF $\alpha$  in tandem with a differential inflammatory  
436 response occurs prior to tissue regeneration. However, our comparative analyses also suggested  
437 that the magnitude of the increase in IL-6 and CXCL1 might serve as early indicators of a  
438 fibrotic repair trajectory. For example, the IL-6 response to injury, although present, was small  
439 and CXCL1 did not respond during both axolotl limb and spiny mouse skin regeneration.

440 Finally, our cellular analysis uncovered a surprisingly rapid adaptive immune response  
441 measured as an early influx of T cells in regenerating compared to non-regenerating species.  
442 Importantly, our findings support that the arrival of T cells in spiny mice is concurrent with the  
443 arrival and proliferation of monocytes [15], which suggests there is a regenerative-competent T  
444 cell response that is different from a fibrotic T cell response. Contrary to hypotheses suggesting  
445 that a strong adaptive immune response reduces regenerative ability [78, 79], our findings  
446 suggest T cells may positively regulate regeneration in spiny mice. Similar to macrophages, T  
447 cells can differentiate into a number of functional subpopulations which differentially affect cells

448 in the inflammatory microenvironment [80]. Our analysis of the transcriptional response to  
449 injury between *M. musculus* and *A. cahirinus* suggests that fibrotic repair is associated with an  
450 accumulation of inactivated T<sub>H</sub> cells, while during regeneration there is an accumulation of  
451 activated cytotoxic T and regulatory T (T<sub>REG</sub>) cells. Studies have shown that loss of cytotoxic  
452 CD8<sup>+</sup> T cells inhibits skeletal muscle regeneration, accelerates bone fracture healing, and  
453 increases fibrosis in incisional wounds [81-87]. Additionally, recent work showed that T<sub>REG</sub>  
454 populations infiltrate injured muscle quickly after injury and are necessary to regulate the ratio of  
455 MHC-class II positive and negative macrophages present in the injured tissue. When the T<sub>REG</sub>  
456 population is ablated subsequent regeneration is impaired [17]. Moreover, spiny mice have a  
457 greater NADPH oxidase induced ROS response [15], which can be partially controlled by T<sub>REG</sub>  
458 cells [88-90]. Thus, these studies support an anti-fibrotic role for T cells and suggest the action  
459 of cytotoxic T and T<sub>REG</sub> cells may have a positive role during spiny mouse epimorphic  
460 regeneration.

461 Together, the data presented here support that tissue regeneration in *Acomys* occurs in  
462 cooperation with an adaptive immune response and that lymphocyte phenotype might play a key  
463 role in facilitating a regenerative or fibrotic response. Ongoing studies in our laboratory are  
464 aimed at characterizing the macrophage and T cell populations that are associated with the  
465 injured tissue during regeneration and fibrotic repair. These future datasets (and the present one)  
466 will create a framework to begin testing how the immune response functions during complex  
467 tissue regeneration in a mammalian model. We believe that modulating the immune response at  
468 the injury microenvironment will be an essential piece to inducing epimorphic regeneration in  
469 tissues that naturally heal by fibrotic repair.

470

471 **AUTHOR CONTRIBUTIONS**

472 Conceptualization, T.R.G., V.O.E. S.G.K. and A.W.S.; Methodology, T.R.G., J.S., and A.W.S;  
473 Validation, T.R.G. and J.S.; Investigation, T.R.G, J.S., J.M.K., C.K.H., V.O.E. and A.W.S.;;  
474 Resources, S.G.K., V.O.E. and A.W.S.; Writing – Original Draft, T.R.G.; Writing – Review &  
475 Editing, T.R.G., J.S., V.O.E. and A.W.S.; Visualization, T.R.G. and A.W.S.; Supervision,  
476 T.R.G., S.G.K., V.O.E. and A.W.S., Project Administration, T.R.G., V.O.E. and A.W.S.;;  
477 Funding Acquisition, S.G.K., V.O.E. and A.W.S.

478

479 **ACKNOWLEDGEMENTS**

480 We thank Adam Cook, Chanung Wang, Bailey Gensheimer, Malik Guidry, John Ewoi and  
481 Stanley Marete for help with live-trapping, animal care and data collection. We also thank Peter  
482 Jessel and the Tomlinson family for kindly allowing us continued access to their property in  
483 Kenya. We acknowledge David Higginbotham, Jim Monegue and rest of the swine unit for their  
484 help and enthusiasm with trapping the wild *Mus musculus*. Funding for this work was provided  
485 by the National Science Foundation (NSF) and the Office for International Science and  
486 Engineering (OISE) to A.W.S. (IOS-1353713) and V.O.E (IOS-1353857). The University of  
487 Kentucky provided additional funding to A.W.S.

488

489 **DECLARATION OF INTERESTS**

490 The authors declare no competing interests.

491

## 492 **FIGURE LEGENDS**

493 **Figure 1 Ability to regenerate and immunity-status are associated with specific systemic**  
494 **immune profiles and immune responses to injury. (A)** Comparison of cytokine  
495 concentrations in serum from uninjured animals showed higher concentrations of IL-4, IL-6,  
496 CCL2 and TNF $\alpha$  in wild-caught animals compared to laboratory-reared animals indicated that  
497 wild animals have a “primed” immune system. No difference was found between non-  
498 regenerators (Mm-UKY, Mm-Kenya and Mm-Wild) and regenerators (Ac and Ap). Data  
499 represent box and whiskers with median, interquartile range and individual data points. N/A  
500 denotes concentrations could not be quantified in any animal of the group. The dashed line in  
501 each graph represents the lower limit of detection for the specific cytokine. N/S denotes  $P>0.05$   
502 for One-way ANOVA (See Supplemental Table 1) and different letters above the data denotes  
503  $P\leq 0.05$  for Tukey-Kramer pairwise comparisons (See Supplemental File). **(B)** The change in  
504 systemic cytokines compared to D0 over 20 days after ear hole punch. A naïve immune system  
505 response (solid lines) was consistent with increased IL-2 and TNF $\alpha$ , and decreased IL-1 $\alpha$   
506 compared to a primed response (intermittent lines) (See Supplemental Table 2). Fibrotic repair  
507 (black) was associated with increases in IL-5, IL-6, IL-17, CCL3 and CXCL1 compared to  
508 regeneration (red). Data represent mean and S.E.M. for at least n=5 animals per species per  
509 timepoint. The dashed line at Y=1 represents no change compared to D0 and the yellow boxes  
510 represent the inflammation resolution window.

511 **Figure 2 The tissue microenvironment is dynamic, and the ability to regenerate is**  
512 **associated with a specific immune response to injury.** The comparison of the change in  
513 cytokines from tissue lysate compared to D0 over 20 days after ear hole punch. All cytokines  
514 varied over time and between groups (See Supplemental Table 3). There was a stronger increase  
515 in CCL3 a muted increase for IL-12 and CXCL1 in immune-naïve (solid lines) compared to  
516 immune-primed animals (intermittent lines). Non-regenerators (black) had stronger increases for  
517 IL-6, CCL2 and CXCL1 compared to regenerators (red). Additionally, IL-17 decreased in non-  
518 regenerators and increased in regenerators. Data represent mean and S.E.M. for at least n=5  
519 animals per species per timepoint. The dashed line at Y=1 represents no change compared to D0  
520 and the yellow boxes represent the inflammation resolution window.

521 **Figure 3 Regeneration is associated with specific temporal cytokine responses in the tissue**  
522 **microenvironment.** The comparison of the change in cytokines from tissue lysate compared to  
523 baseline. Non-regenerators (Mm-UKY, Mm-Kenya, and Mm-Wild: Black) show a stronger  
524 response compared to regenerators (Ac and Ap: Red) for several inflammatory cytokines during  
525 the immediate response, acute inflammatory phase. These differences mostly resolved at day 10  
526 and 20. In contrast, regenerators showed a stronger IL-12 and IL-17 response during tissue  
527 morphogenesis. Data represent box and whiskers with median, interquartile range and individual  
528 data points. N/A denotes concentrations could not be quantified. The dashed line at Y=1  
529 represents no change compared to D0. Each graph showed  $P<0.05$  for effect of group using a  
530 One-way ANOVA on log-transformed data (See Supplemental Table 4) and different letters  
531 above each group denotes  $P<0.05$  for Tukey-Kramer pairwise comparisons (See Supplemental  
532 File).

533

534 **Figure 4 The regeneration microenvironment is primed by greater T cell influx and**  
535 **activated T<sub>REG</sub> signature. (A)** Comparison of total CD3<sup>+</sup> cells quantified by flow cytometry  
536 from disassociated ear pinna and **(B)** the ratio relative to uninjured tissue for *M. musculus* (black)  
537 and *A. cahirinus* (red). Data represent mean and S.E.M. and n=4 or 5. An \* denotes  $P < 0.05$  for  
538 pairwise comparison within the day between species for Tukey-Kramer HSD posthoc test. **(C-I)**  
539 Representative immunohistochemistry for CD3 (red) counterstained with DAPI (gray) at the  
540 proximal wound margin (amputation plane can be determined from the end of the cartilage—  
541 indicated by the dotted line) from D5 and D15 after injury of *M. musculus* (C, D) and *A.*  
542 *cahirinus* (E, F). More T cells (yellow arrowhead) were present throughout the wound bed and  
543 were mainly found in the dermis of *A. cahirinus* compared to *M. musculus*. The T cells  
544 associated with epidermis (boundaries indicated by the dotted line) tended to be spindle-like in  
545 *M. musculus* (G), while rounded in *A. cahirinus* (H). The dermal T cells in *A. cahirinus* also  
546 tended to be in close proximity to regenerating epidermal appendages (I). N=4 and bar equals  
547 200  $\mu\text{m}$  (C-F) or 20  $\mu\text{m}$  (G-I). **(J)** Heatmap of differential gene expression compared to  
548 uninjured tissue suggests that the regeneration microenvironment contains a substantial NK,  
549 CD8<sup>+</sup> and T<sub>REG</sub> cell response while fibrotic repair has a CD4<sup>+</sup> cell response. Data comes from a  
550 previously published analysis [40].

551

552 **Figure 5 Time-dependent STAT3 activation in the blastema is associated with regeneration.**  
553 **(A-B)** Comparison of representative immunoblots for pSTAT3 and ACTB for indicated time and  
554 species from injured tissue homogenate from ear-hole punch assay (A). Fibrotic repair is  
555 associated with strong early STAT3 activation while regeneration is associated with a weak early  
556 and strong postponed activation (B). Data represent mean fold change of pSTAT3 intensity  
557 normalized to ACTB intensity and relative to D0 and S.E.M. n=4 individuals per time point and  
558 species (B). **(C-F)** Representative images for immunohistochemistry for pSTAT3 (Brown)  
559 counterstained with hematoxylin (Blue) for *M. musculus* (C, C', E and E') and *A. cahirinus* (D,  
560 D', F and F') at the indicated time points. On D2 after injury, nearly every epidermal cell in *M.*  
561 *musculus* was positive compared to about half in *A. cahirinus* (C, D). On D15 after injury, only  
562 a small population of epidermal cells in *M. musculus* were positive compared to about half in *A.*  
563 *cahirinus* (E, F). Additionally, about half of the cells in the forming blastema remain positive at  
564 D15. Data represent n=3, and bar equals 200  $\mu\text{m}$ .

565

566 **Figure 6 COX-2 inhibition does not liberate regeneration in *M. musculus*.** **(A)** Celecoxib  
567 treatment during the first 10 days of injury reduces secondary inflammation caused by IL-6 and  
568 CXCL1. **(B-C)** Celecoxib treatment did not affect the rate of ear-hole closure from D5 to D30  
569 (B), or ear-hole area at D64 (C). **(D-F)** Mason's trichrome stain on D10 ear tissue from control  
570 (D) and treatment (E) showed 20% of the distal injury plane from treated ears were not re-  
571 epithelialized, while 100% of control treated ears and the proximal injury plane were re-  
572 epithelialized (F). **(G-I)** Picosirius stain on D64 ear tissue from control (G) and treatment (H)  
573 showed no difference in the total collagen fibrotic area distal to the amputation plane (I). Data  
574 represent mean  $\pm$  S.E.M. and the lines represent cubic regression for n=10 per treatment (B),  
575 OR individual data (red dots) and median and interquartile range for n=10 per treatment (C, I).  
576



577 TABLES

578 **Table 1:** Comparison of cytokine slopes from parallelism test of cytokine assay. This was used  
 579 to determine which species and source comparisons could be made for each cytokine in the  
 580 Comparison column.

| Antigen       | Standard         | Sample  | <i>Mus musculus (Mm)</i>               | <i>Acomys cahirinus (Ac)</i>           | <i>Acomys percivali (Ap)</i>           | Comparison |
|---------------|------------------|---------|----------------------------------------|----------------------------------------|----------------------------------------|------------|
| IL-1 $\alpha$ | -0.89 $\pm$ 0.03 | Serum:  | -1.05 $\pm$ 0.03*                      | -0.82 $\pm$ 0.14*                      | -1.37 $\pm$ 0.10*                      | Mm, Ac, Ap |
|               |                  | Tissue: | <i>Too few points</i> <sup>^</sup>     | -1.03 $\pm$ 0.04*                      | -0.97 $\pm$ 0.18*                      | Mm, Ac, Ap |
| IL-1 $\beta$  | -0.93 $\pm$ 0.10 | Serum:  | <i>Too few points</i> <sup>&amp;</sup> | <i>Not detected</i>                    | -1.63 $\pm$ 0.21*                      | Mm, Ap     |
|               |                  | Tissue: | -0.94 $\pm$ 0.02*                      | -0.86 $\pm$ 0.03*                      | -0.65 $\pm$ 0.07*                      | Mm, Ac, Ap |
| IL-2          | -1.34 $\pm$ 0.05 | Serum:  | <i>Too few points</i> <sup>&amp;</sup> | <i>Not detected</i>                    | -0.87 $\pm$ 0.00*                      | Mm, Ap     |
|               |                  | Tissue: | -1.21 $\pm$ 0.10*                      | -0.59 $\pm$ 0.22*                      | -0.57 $\pm$ 0.20*                      | Mm, Ac, Ap |
| IL-4          | -0.89 $\pm$ 0.06 | Serum:  | -0.88 $\pm$ 0.18*                      | <i>Too few points</i> <sup>&amp;</sup> | -2.16 $\pm$ 0.32*                      | Mm, Ap     |
|               |                  | Tissue: | -0.69 $\pm$ 0.09*                      | -0.68 $\pm$ 0.39*                      | -0.75 $\pm$ 0.12*                      | Mm, Ac, Ap |
| IL-5          | -1.13 $\pm$ 0.01 | Serum:  | -1.63 $\pm$ 0.20*                      | -1.53 $\pm$ 0.96*                      | -2.52 $\pm$ 0.28*                      | Mm, Ac, Ap |
|               |                  | Tissue: | -0.73 $\pm$ 0.05*                      | <i>Too few points</i> <sup>&amp;</sup> | -0.87 $\pm$ 0.03*                      | Mm, Ap     |
| IL-6          | -1.07 $\pm$ 0.02 | Serum:  | -0.74 $\pm$ 0.12*                      | <i>Too few points</i> <sup>&amp;</sup> | -1.81 $\pm$ 0.11*                      | Mm, Ap     |
|               |                  | Tissue: | -0.80 $\pm$ 0.14*                      | -0.47 $\pm$ 0.06*                      | -0.63 $\pm$ 0.11*                      | Mm, Ac, Ap |
| IL-10         | -1.56 $\pm$ 0.03 | Serum:  | <i>Not detected</i>                    | <i>Not detected</i>                    | <i>Not detected</i>                    | None       |
|               |                  | Tissue: | <i>Not detected</i>                    | 0.52 $\pm$ 0.25                        | 0.24 $\pm$ 0.52                        | None       |
| IL-12         | -1.10 $\pm$ 0.02 | Serum:  | -0.68 $\pm$ 0.16*                      | -1.55 $\pm$ 0.49*                      | -1.26 $\pm$ 0.18*                      | Mm, Ac, Ap |
|               |                  | Tissue: | -0.73 $\pm$ 0.17*                      | -0.68 $\pm$ 0.16*                      | -0.63 $\pm$ 0.15*                      | Mm, Ac, Ap |
| IL-17         | -1.03 $\pm$ 0.02 | Serum:  | -0.72 $\pm$ 0.25*                      | -0.16 $\pm$ 0.23                       | -0.49 $\pm$ 0.16                       | Mm         |
|               |                  | Tissue: | -1.28 $\pm$ 0.04*                      | -0.85 $\pm$ 0.34*                      | -0.81 $\pm$ 0.03*                      | Mm, Ac, Ap |
| CSF2          | -1.45 $\pm$ 0.05 | Serum:  | <i>Not detected</i>                    | <i>Not detected</i>                    | <i>Too few points</i> <sup>&amp;</sup> | None       |
|               |                  | Tissue: | -0.71 $\pm$ 0.11*                      | -0.68 $\pm$ 0.25*                      | -0.70 $\pm$ 0.10*                      | Mm, Ac, Ap |
| CCL2          | -1.17 $\pm$ 0.00 | Serum:  | -1.23 $\pm$ 0.14*                      | <i>Too few points</i> <sup>&amp;</sup> | -1.56 $\pm$ 0.13*                      | Mm, Ap     |
|               |                  | Tissue: | -0.97 $\pm$ 0.02*                      | -1.23 $\pm$ 0.14*                      | -0.63 $\pm$ 0.10*                      | Mm, Ac, Ap |
| CCL3          | -0.98 $\pm$ 0.06 | Serum:  | -2.05 $\pm$ 0.03*                      | -1.25 $\pm$ 0.09*                      | -1.01 $\pm$ 0.09*                      | Mm, Ac, Ap |
|               |                  | Tissue: | -0.93 $\pm$ 0.01*                      | -0.95 $\pm$ 0.01*                      | -0.94 $\pm$ 0.06*                      | Mm, Ac, Ap |
| CCL5          | -0.90 $\pm$ 0.07 | Serum:  | -0.78 $\pm$ 0.03*                      | <i>Not detected</i>                    | 0.33 $\pm$ 0.32                        | Mm         |
|               |                  | Tissue: | -0.90 $\pm$ 0.16*                      | 0.34 $\pm$ 0.13                        | 0.07 $\pm$ 0.27                        | Mm         |
| TNF $\alpha$  | -1.10 $\pm$ 0.06 | Serum:  | -1.36 $\pm$ 0.38*                      | -2.15 $\pm$ 0.01*                      | -1.09 $\pm$ 0.17*                      | Mm, Ac, Ap |
|               |                  | Tissue: | -1.14 $\pm$ 0.10*                      | -0.93 $\pm$ 0.01*                      | -1.21 $\pm$ 0.03*                      | Mm, Ac, Ap |
| IFN $\gamma$  | -0.79 $\pm$ 0.10 | Serum:  | -0.60 $\pm$ 0.16*                      | -1.48 $\pm$ 0.72*                      | -1.21 $\pm$ 0.22*                      | Mm, Ac, Ap |
|               |                  | Tissue: | -0.81 $\pm$ 0.31*                      | -0.72 $\pm$ 0.05*                      | -0.84 $\pm$ 0.05*                      | Mm, Ac, Ap |
| CXCL1         | -1.20 $\pm$ 0.02 | Serum:  | -1.15 $\pm$ 0.27*                      | <i>Not detected</i>                    | <i>Not detected</i>                    | Mm         |
|               |                  | Tissue: | -1.11 $\pm$ 0.05*                      | <i>Too few points</i> <sup>&amp;</sup> | -1.15 $\pm$ 0.29*                      | Mm, Ap     |

581 Slopes in *italics* are not different from zero ( $P > 0.05$  for regression test)

582 \* denotes slope is similar to the standard and can be reliably quantified

583 & denotes values are below the assay's lower limit of detection

584 ^ denotes values are above the assay's upper limit of quantification

585



586 **Table 2:** Comparison of *A. cahirinus* predicted peptide sequences used in cytokine analysis

| <b>Gene ID</b>                | <b>Peptide ID</b> | <b>% similar to<br/><i>M. musculus</i></b> | <b>% similar to<br/><i>R. norvegicus</i></b> | <b>% similar to<br/><i>H. sapiens</i></b> |
|-------------------------------|-------------------|--------------------------------------------|----------------------------------------------|-------------------------------------------|
| <i>Il1a</i>                   | IL-1 $\alpha$     | 82.90                                      | 86.90                                        | 66.90                                     |
| <i>Il1b</i>                   | IL-1 $\beta$      | 87.71                                      | 87.71                                        | 72.35                                     |
| <i>Il2</i>                    | IL-2              | 70.41                                      | 84.61                                        | 71.59                                     |
| <i>Il4</i>                    | IL-4              | 66.45                                      | 77.21                                        | 56.32                                     |
| <i>Il5</i>                    | IL-5              | 90.15                                      | 84.84                                        | 68.93                                     |
| <i>Il6</i>                    | IL-6              | 75.23                                      | 78.97                                        | 48.13                                     |
| <i>Il10</i>                   | IL-10             | 85.05                                      | 87.93                                        | 74.13                                     |
| <i>Il12a</i>                  | IL-12 p35         | 70.42                                      | 80.54                                        | 55.25                                     |
| <i>Il12b</i>                  | IL-12 p40         | 73.58                                      | 74.10                                        | 63.33                                     |
| <i>Il17a</i>                  | IL-17             | 84.88                                      | 83.13                                        | 75.58                                     |
| <i>Cxcl1</i>                  | KC                | 80.37                                      | 81.30                                        | 69.15                                     |
| <i>Ccl2</i>                   | MCP-1             | 73.50                                      | 70.86                                        | 43.70                                     |
| <i>Ccl3</i>                   | MIP-1 $\alpha$    | 93.54                                      | 94.62                                        | 81.72                                     |
| <i>Ccl5</i>                   | RANTES            | 88.04                                      | 84.78                                        | 85.86                                     |
| <i>Csf2</i>                   | GM-CSF            | 65.24                                      | 73.75                                        | 61.70                                     |
| <i>IFN<math>\gamma</math></i> | IFN $\gamma$      | 56.77                                      | 57.05                                        | 41.56                                     |
| <i>Tnf</i>                    | TNF $\alpha$      | 95.81                                      | 96.65                                        | 84.93                                     |

587

## 588 MATERIALS AND METHODS

### 589 *Animals*

590 *Mus musculus* (Mm-UKY) and *Acomys cahirinus* (Ac) were maintained at our animal  
591 facility at the University of Kentucky, Lexington, KY, USA. Mm-UKY were sexually mature  
592 (10- to 12-week old), female, outbred Swiss Webster (ND4, Envigo, Indianapolis, IN). They  
593 were housed at a density of 2-4 individuals in static IVC cages with pine shavings and given  
594 autoclaved water and 18% protein mouse chow (Tekland Global 2918, Envigo). Ac were  
595 sexually mature (12- to 28-weeks old), males and females and were housed at a density of 10-15  
596 individuals in large metal wire cages (24 inch x 12 inch x 14 inch, height x width x depth,  
597 Quality Cage Company, Portland, OR) with pelleted pine bedding (Southern States Cooperative,  
598 Inc., Richmond, VA) and given autoclaved water and a 3:1 mixture by volume of 14% protein  
599 mouse chow (Teklad Global 2014, Envigo) and black-oil sunflower seeds (Pennington Seed Inc.,  
600 Madison, GA) [91]. Additionally, the air within facility was filtered, and the animals were  
601 exposed to natural light through large windows (approximately 12h:12h L:D light cycle during  
602 the experiment). All Mm-UKY and Ac samples were collected between 9/20/2015 and  
603 10/28/2015.

604 Wild *M. musculus* (Mm-Wild) were live trapped at the C. Oran Little Research Center in  
605 Versailles, KY (38°4'N, 84°44'W) and maintained in an alternate animal facility at the  
606 University of Kentucky. Mm-Wild were housed at a density of 10-12 individuals in large metal  
607 wire cages with pelleted pine bedding and given autoclaved water and 18% protein mouse chow.  
608 The animals acclimated to captivity for at least twenty-one days before any experiments were  
609 started. The air within the facility was filtered and the animals were exposed to a 12:12h L:D

610 cycle by fluorescent lights. All Mm-Wild samples were collected between 4/1/2017 and  
611 6/21/2017 and 12/12/2017 and 3/6/2018.

612 The Kenyan *M. musculus* (Mm-Kenya) were sexually mature (10- to 12-week old),  
613 female, outbred Swiss Webster mice obtained from a local breeder in Nairobi, Kenya and  
614 maintained in an animal facility at the University of Nairobi, Kenya. Sexually mature *Acomys*  
615 *percivali* (Ap) were live-captured at Mpala Research Centre in Laikipia, Kenya (0°17'N,  
616 37°52'E), and transported to the University of Nairobi for study. Each species was separated by  
617 sex and housed at a density of 10-15 animals in large metal wire cages, given tap water, fed  
618 mouse pencils (Argroside Inc., Nairobi, Kenya) 1x per day and exposed to natural light through  
619 windows (equivalent 12h:12h L:D cycle). The animals acclimated to captivity for at least  
620 twenty-one days before any experiments were started. Additionally, the facility was open to the  
621 natural environment (i.e., the mice were exposed to Nairobi air) and cool nighttime temperatures  
622 were supplemented with ceramic heaters. Mm-Kenya samples were collected between  
623 6/04/2015 and 7/04/2015 and Ap samples were collected between 5/04/2015 and 7/04/2015, and  
624 between 5/02/2016 and 6/04/2016.

625 All animal trapping and procedures were approved by the University of Kentucky  
626 Institutional Animal Care and Use Committee (IACUC) under protocol 2013-1119, Kenyan  
627 Wildlife Service (KWS), and the University of Nairobi Faculty of Veterinary Medicine Animal  
628 Care and Use Committee (FVM ACUC). Research in Kenya was approved by the Kenyan  
629 National Council for Science and Technology (NACOSTI). All wild species trapped were  
630 species of least concern.

631

632 ***Sample collection and preparation***

633 We used a 4 mm biopsy punch to create a hole through the ear pinna, as previously  
634 described [40]. Healing ear tissue was collected on D0, 1, 2, 3, 5, 10, 15 and 20. To minimize  
635 circadian effects, animals were injured between 10:00 and 12:00, and samples were collected  
636 between 11:00 and 15:00. Animals were deeply anesthetized with 5% (v/v) isoflurane and a  
637 maximal amount of blood was collected by cardiac puncture using a 25-gauge needle. An 8 mm  
638 biopsy punch was used to harvest healing ear tissue.

639 To isolate serum, blood was collected into a serum separator tube (#454243, Greiner bio-  
640 one, Kremsmünster, Austria) and allowed to clot for at least 45 minutes, followed by  
641 centrifuging at 3,000 x g for 10 minutes. Serum was aliquoted and stored at -80°C or on dry ice  
642 until analysis. The tissue was used for two downstream assays, histology and cytokine  
643 quantification. For histology, one of the 8 mm biopsies was placed into 10% (v/v) neutral  
644 buffered formalin (American MasterTech, McKinney, TX) overnight, dehydrated, embedded in  
645 paraffin and cut to 5 µM thickness on a rotary microtome. For cytokine quantification, a ring of  
646 tissue closest to the injury approximately 1 mm wide was snap frozen in liquid nitrogen or a  
647 slurry of dry ice and ethanol, and then stored at -80°C or on dry ice. Next, the tissue was  
648 homogenized in RIPA buffer supplemented with protease and phosphatase inhibitors (#24948,  
649 Santa Cruz Biotechnology, Inc. Dallas, TX; #78427, Thermo Scientific) using ceramic beads  
650 (Matrix D, MP Biomedicals, LLC, Solon, OH) and a bead mill for 5 minutes (Next Advance,  
651 Inc., Troy, NY), centrifuged at 10,000 x g for 15 minutes to pellet insoluble protein, and the  
652 soluble protein was separated into a new tube. The total protein was quantified by bicinchoninic  
653 acid assay (#23225, Thermo Scientific) with a standard curve created from the same stock of  
654 bovine serum albumin, and then the protein lysate was stored at -80°C or on dry ice until  
655 analysis.

656

### 657 *Cytokine assay*

658 To assess the immune response to injury in multiple species, we evaluated methods that:

659 1) used minimal sample, 2) measured local (tissue lysate) and systemic (serum) samples, 3)

660 measured several cytokines at once, 4) differentiated the magnitude and type of immune

661 response during an ear punch assay, and 5) exhibited cross-reactivity among the study species.

662 We used a custom-designed, multiplexed, sandwich ELISA array (Quansys Biosciences, Logan

663 UT). This platform meets the above requirements and the experiments can be performed in

664 multiple locations (i.e., Kentucky and Kenya) because the imager and reagents can be easily

665 transported. Importantly, the imager does not require specialized calibration after being moved,

666 and the reagents do not need remain frozen. The custom assay was designed to measure 16

667 antigens including IL-1 $\alpha$ , IL-1 $\beta$ , IL-2, IL-4, IL-5, IL-6, IL-10, IL-12p70, IL-17, CCL2, CCL3,

668 CCL5, CSF2, IFN $\gamma$ , TNF $\alpha$  and CXCL1.

669 Initial testing identified that antigens from serum could be quantified by diluting serum in

670 the supplied mouse specific diluent 1:1 and from tissue lysate using 5, 40, and 80  $\mu$ g total protein

671 in RIPA buffer for *M. musculus*, *A. cahirinus*, and *A. percivali*, respectively. The samples were

672 run in duplicate using a protocol modified from the manufacturer's instructions, as follows: All

673 serum samples were diluted 1:1 (serum : diluent) and all tissue samples were diluted 1:1 (RIPA +

674 lysate : mouse sample diluent) to a volume of 50  $\mu$ L per well. The diluted samples were then

675 loaded onto a new assay plate with an appropriate standard curve (1:3 to 1:59049) and four

676 blanks. Samples were incubated at 4°C for 8 hours on a plate shaker set to 500 rpm to capture

677 antigen in each well. After washing the plate 4 times with wash buffer, the primary antibody

678 cocktail was loaded and the plate was incubated at 4°C for 8 hours on a plate shaker set to 500

679 rpm to allow binding of the biotinylated detection antibodies to the captured antigens. After  
680 washing the plate 4 times, streptavidin-HRP conjugated secondary antibody was loaded and the  
681 plate was incubated at room temperature for 30 minutes on a plate shaker set to 500 rpm. The  
682 plate was washed 8 times, chemiluminescent reagent was added, and the plate was immediately  
683 imaged with a chemiluminescent plate imager set to the manufacturer recommended image  
684 capture settings (Q-view imager, Quansys Biosciences).

685 We verified that cytokine concentrations derived from the Quansys multiplex array were  
686 comparable between *Mus* and *Acomys* by testing for parallelism of the mouse standards with  
687 *Acomys* serum and tissue lysate. We also evaluated the peptide-level similarity between *Mus* and  
688 *Acomys* for each gene represented on the array. Parallelism was examined using standard  
689 protocols [92, 93]. Briefly, samples from species and source were randomly pooled to provide a  
690 representative cytokine concentration and were run in triplicate at serial dilutions (1:2, 1:6, 1:18,  
691 1:54, and 1:162). To determine parallelism, linear regressions were calculated for samples that  
692 had at least 3 dilutions above the lower limit of detection and compared the slopes to the  
693 standard curve. For peptide comparisons, the *A. cahirinus* genomic and/or transcribed sequences  
694 corresponding to the 16 cytokines of interest were identified by using TBLASTX with inputted  
695 *M. musculus* peptide sequence into previously published spiny mouse transcriptomes [40, 94]  
696 and an unpublished draft genome. The mRNA sequence was then translated and aligned to  
697 peptide sequences for *M. musculus*, *Rattus norvegicus* and *Homo sapiens* using MAFFT [95, 96].  
698 Total similarity and identity was calculated using the Sequence Identity and Similarity (SIAS)  
699 tool (<http://imed.med.ucm.es/Tools/sias.html>).

700 Individual cytokine concentrations were obtained using image analysis software (Q-view  
701 v3.09, Quansys Biosciences). First, the standard curve pixel intensity values were observed and

702 pixel intensity values greater than 60,000 were masked to remove saturated data points. Sample  
703 concentrations were calculated from standard curves created by a five parameter logistic  
704 regression (5PL) with  $\sqrt{y}$  weighting. The average value from each duplicate was then used for  
705 subsequent analyses. If the average value was above the lower limit of detection and the pixel  
706 intensity co-efficient of variation between duplicates was greater than 15%, the sample was re-  
707 assayed on another plate and a new average calculated. Initially, we re-assayed tissues samples  
708 below the limit of detection with a greater amount of total protein, but in most cases, additional  
709 protein did not equate to quantifiable antigen, suggesting that there was a minimal amount of  
710 antigen in those samples. Thus, to maximize use of the plates, we opted to quantify a greater  
711 total number of samples and assayed each sample at one dilution. Antigens below the lower  
712 limit of detection were recorded as “not present”, and to calculate ratios they were assigned the  
713 largest value of the lower limit of detection for that antigen across all plates assayed [97].

714

### 715 ***Cox-2 inhibition***

716 Mm-UKY were subjected to a routine ear punch assay and randomly split into two  
717 groups: A) 100 mg/kg celecoxib, a potent and specific COX-2 inhibitor or B) vehicle. A  
718 Celecoxib capsule was opened and mixed into 0.5% (w/v) methyl cellulose to the appropriate  
719 concentration and a 200  $\mu$ L dose was administered (100 mg active drug / kg body weight) by  
720 oral gavage using a 20x30 mm gavage needle tipped with a sugar solution each morning  
721 beginning 1 day before injury through 20 days after injury. Ear holes were measured and ear  
722 hole area was calculated for every 5 days post injury, as previously described [40]. On D10 and  
723 64 entire ears were harvested from a different set of animals and used for histology and stained  
724 with Mason’s Trichrome or Picrosirius red, as previously described [40]. Re-epithelialization

725 was confirmed by the presence of a connected and complete epidermis distal to the amputation  
726 plane by examining two tissue sections from the proximal and distal wound sites for each animal  
727 at D10. Fibrosis was determined by quantifying the area of collagen deposition in the dermis  
728 distal from the amputation plane from two sections from the proximal and distal wound sites  
729 using circular polarized light microscopy and the thresholding function in Image J after  
730 removing the epidermis, epidermal appendages and tissue artifacts.

731

### 732 *Flow Cytometry*

733 To quantify the number of CD3<sup>+</sup> cells present in healing ear tissue, tissue was harvested  
734 from a separate group of Mm-UKY and Ac females at D0, 1, 3, 7 and 15 using an 8 mm biopsy  
735 punch. Harvested tissue from both ears was combined and a single-cell suspension was created  
736 using combination of enzymatic and mechanical digestion, as previously described [15]. Total  
737 cells were counted by hemacytometer and incubated with PE-conjugated-anti-CD3 (Clone 17A2,  
738 BioLegend, San Diego, CA) at a concentration of 1  $\mu\text{g} / 10^6$  cells for 1 hour at room temperature,  
739 washed and suspended in cell staining buffer (Cat#420201, BioLegend). Flow cytometry was  
740 carried out at the University of Kentucky Flow Cytometry Core using the iCyt Synergy sorter  
741 system (Sony Biotechnology Inc., San Jose, CA). Laser calibration and compensation was  
742 performed for each experiment using unstained and single fluorescent control samples. Analysis  
743 was done using FlowJo (Version 10, FlowJo, LLC, Ashland, OR) to identify CD3-positive  
744 lymphocytes by PE fluorescence and forward- and side-scatter. The same gating strategies  
745 between species were used (n = 4 or 5 animals per timepoint).

746

### 747 *Immunohistochemistry*



748 To identify the locations of STAT3 responsive cells and CD3+ cells, tissue sections were  
749 de-paraffinized, rehydrated, and prepared for examination by light- or fluorescent-microscopy,  
750 respectively. For light-microscopy, resident peroxidase was quenched by H<sub>2</sub>O<sub>2</sub>, antigens were  
751 exposed by heat-mediated retrieval with sodium citrate buffer, pH=6.0, blocked with serum,  
752 incubated with primary antibody (anti-pSTAT3, Cell Signaling Technology Cat#9145, 1:200)  
753 overnight at 4°C, incubated with a horseradish peroxidase conjugated secondary (Santa Cruz  
754 Biotechnology, Cat#sc-2030, 1:1000) for 1 hour at room temp, treated with 3,3'-  
755 Diaminobenzidine (SK-4100, Vector Laboratories, Burlingame, CA) until a visible brown  
756 precipitate was observed, counter-stained with hematoxylin, dehydrated and cover-slipped. For  
757 fluorescent-microscopy, antigens were exposed by heat mediated retrieval with sodium citrate  
758 buffer, pH=6.0, resident avidin and biotin was blocked, sections blocked with serum, incubated  
759 with primary antibody (anti-CD3, DAKO, Cat#A0452, 1:500) overnight at 4°C, incubated with a  
760 biotin conjugated secondary antibody (Vector Laboratories, Cat#PK-6101, 1:400) for 1 hour at  
761 room temp, incubated with streptavidin conjugated AlexaFlour-594 (Molecular Probes,  
762 Cat#S11227, 1:5,000), counter-stained with 4',6-Diamidino-2-Phenylindole, Dihydrochloride  
763 (Molecular Probes, Cat#D1306, 1:10,000) and cover-slipped. Images were acquired using a  
764 compound epi-fluorescence microscope (IX-51, Olympus Corporation, Tokyo, Japan) equipped  
765 with a CCD camera (DP-74, Olympus Corporation) and software (cellSens v1.12, Olympus  
766 Corporation).

767

### 768 ***Immunoblot***

769 To quantify the STAT3 response to injury, 30 or 40 µg of total protein from tissue lysate  
770 was denatured and separated by SDS polyacrylamide gel electrophoresis and transferred to a

771 PVDF membrane (IB401002, Life Technologies). Membranes were cut along the 55 kDa ladder  
772 marker and blocked with either 5% BSA or 5% dry skim milk in TBST for 1 hour at room  
773 temperature, incubated with primary antibody (pSTAT3, Cell Signaling, Cat#9145, 1:2000;  
774 ACTB, Cell Signaling, Cat#4967, 1:5000), washed, incubated with secondary antibody (Santa  
775 Cruz Biotechnologies, Cat#sc-2030, 1:10,000), and visualized by chemiluminescence  
776 (Cat#RPN2235, GE Healthcare) using a digital CCD camera (UVP LLC, Upland, CA). Total  
777 pixel intensity was quantified using regions of interest and normalized to background and  
778 uninjured tissue using ImageJ2 [98].

779

### 780 *Statistical Analysis*

781 To compare the baseline serum cytokine concentrations we used a one-way ANOVA and  
782 Tukey-Kramer HSD posthoc tests to test for individual group differences. To compare the  
783 dynamics of cytokine concentration over time in serum and tissue, a ratio of the injured  
784 concentration mean to the uninjured concentration mean was calculated for each cytokine by  
785 group (Mm-UKY, Mm-Kenya, Mm-Wild, Ac and Ap) and time point (D1-D20). To normalize  
786 cytokine fold-change distributions, data were log transformed. A two-way ANOVA was then  
787 used to test for effects of time and group on tissue and serum separately. Pairwise comparisons  
788 were tested using the Tukey-Kramer HSD method. In the event that several undetected values  
789 existed at an individual timepoint and log transformed data still did not meet normality, we used  
790 non-parametric Wilcoxon rank sum tests with Steel Dwass post-hoc tests for pairwise  
791 comparisons. Datasets for which non-parametric analyses were performed are indicated in figure  
792 legends.

793           To compare the immunoblot data, pixel intensity was calculated for the bands of interest  
794 using an identical sized region of interest with ImageJ [98]. The pixel intensity of pSTAT3 was  
795 normalized to ACTB and a two-way ANOVA with time and species was used to compare values  
796 and pairwise comparisons were made using the Tukey-Kramer HSD method. To compare the  
797 flow cytometry results, we used a two-way ANOVA with time and species on log-transformed  
798 data and pairwise comparisons were made using the Tukey-Kramer HSD method. To compare  
799 the ear-hole closure rate between control and celecoxib-treated animals we used a repeated-  
800 measures ANOVA and cubic regression, as previously published [40]. To compare the ear-hole  
801 area and area of tissue positive for Picrosirius, we used a student's t-test. All statistical tests  
802 were done using JMP Pro 14 (SAS Institute Inc., Cary, NC) or Prism 5.0 (GraphPad Software,  
803 Inc., San Diego, CA). A *P*-value < 0.05 was used to determine significance for each test. All  
804 graphs were created in Prism 5.0 and placed into figures using Illustrator CS5 (Adobe Systems,  
805 Inc. San Jose, CA).

806

807 **SUPPLEMENTAL INFORMATION**

808 **Supplemental Table 1:** One-way ANOVA analyses of log-transformed uninjured serum data.  
809 Groups listed in comparison column represent groups for which data was quantified and could be  
810 compared. *P*-values indicate where at least one group is significantly different from another  
811 group. Tukey-Kramer HSD post-hoc tests were used for pairwise comparisons are summarized  
812 in Figure 1A (See Supplemental File).

| Antigen       | Comparison                    | N   | F     | <i>P</i> -value |
|---------------|-------------------------------|-----|-------|-----------------|
| IL-1 $\alpha$ | All groups                    | 5   | 2.69  | 0.051           |
| IL-1 $\beta$  | All groups                    | 5   | 11.15 | <0.001*         |
| IL-2          | All groups                    | 5   | 10.27 | <0.001*         |
| IL-4          | All groups                    | 5   | 6.00  | 0.001*          |
| IL-5          | All groups                    | 5   | 2.63  | 0.055           |
| IL-6          | All groups                    | 5   | 6.31  | 0.001*          |
| IL-12         | All groups                    | 5   | 5.21  | 0.003*          |
| IL-17         | Mm-UKY, Mm-Kenya, Mm-Wild, Ap | 4   | 1.15  | 0.349           |
| CSF2          | None – all undetectable       | n/a | n/a   | n/a             |
| CCL2          | All groups                    | 5   | 16.03 | <0.001*         |
| CCL3          | All groups                    | 5   | 2.59  | 0.058           |
| IFN $\gamma$  | All groups                    | 5   | 3.25  | 0.026*          |
| TNF $\alpha$  | All groups                    | 5   | 23.80 | <0.001*         |
| CXCL1         | All groups                    | 5   | 4.07  | 0.010*          |

813

814

815 **Supplemental Table 2:** Two-way ANOVA analyses of log-transformed serum time series data.  
 816 Groups listed in comparison column represent groups for which data was quantified throughout  
 817 the time series. Tukey-Kramer HSD post-hoc tests were used for pairwise comparisons and the  
 818 results are summarized in Figure 1B (See Supplemental File).

| Antigen       | Comparison                    | N   | Group |         | Day  |         | Group*Day |         |
|---------------|-------------------------------|-----|-------|---------|------|---------|-----------|---------|
|               |                               |     | F     | P-value | F    | P-value | F         | P-value |
| IL-1 $\alpha$ | All groups                    | 255 | 32.51 | <0.001* | 0.93 | 0.471   | 1.62      | 0.039*  |
| IL-1 $\beta$  | Mm-UKY, Mm-Wild, Ap           | 157 | 3.02  | 0.052   | 1.06 | 0.391   | 1.08      | 0.386   |
| IL-2          | All groups                    | 255 | 27.82 | <0.001* | 2.46 | 0.025*  | 1.96      | 0.006*  |
| IL-4          | All groups                    | 255 | 34.54 | <0.001* | 1.47 | 0.188   | 1.55      | 0.053   |
| IL-5          | All groups                    | 255 | 63.22 | <0.001* | 0.94 | 0.469   | 0.82      | 0.706   |
| IL-6          | All groups                    | 255 | 64.61 | <0.001* | 2.29 | 0.037*  | 2.63      | <0.001* |
| IL-12         | All groups                    | 255 | 33.25 | <0.001* | 2.21 | 0.660   | 0.91      | 0.583   |
| IL-17         | Mm-UKY, Mm-Kenya, Mm-Wild, Ap | 205 | 7.64  | <0.001* | 2.78 | 0.013*  | 2.60      | <0.001* |
| CSF2          | None – all undetectable       | 0   | n/a   | n/a     | n/a  | n/a     | n/a       | n/a     |
| CCL2          | All groups                    | 255 | 5.72  | <0.001* | 1.46 | 0.193   | 1.16      | 0.278   |
| CCL3          | All groups                    | 255 | 38.75 | <0.001* | 0.91 | 0.486   | 1.47      | 0.079   |
| IFN $\gamma$  | All groups                    | 255 | 37.81 | <0.001* | 1.22 | 0.296   | 1.77      | 0.018*  |
| TNF $\alpha$  | All groups                    | 255 | 31.88 | <0.001* | 0.85 | 0.535   | 0.91      | 0.583   |
| CXCL1         | Mm-UKY, Mm-Kenya, Mm-Wild, Ap | 205 | 69.43 | <0.001* | 4.33 | <0.001* | 1.47      | 0.104   |

819

820

821 **Supplemental Table 3:** Two-way ANOVA analyses of log-transformed tissue lysate time series  
 822 data. Groups listed in comparison column represent groups for which data was quantified  
 823 throughout the time series. *P*-values indicate where at least one group is significantly different  
 824 from another group. Tukey-Kramer HSD post-hoc tests were used for pairwise comparisons and  
 825 the results are summarized in Figure 2 (See Supplemental File).

| Antigen       | Comparison                          | N   | Group  |                 | Day    |                 | Group*Day |                 |
|---------------|-------------------------------------|-----|--------|-----------------|--------|-----------------|-----------|-----------------|
|               |                                     |     | F      | <i>P</i> -value | F      | <i>P</i> -value | F         | <i>P</i> -value |
| IL-1 $\alpha$ | None – all above limit of detection | 0   | n/a    | n/a             | n/a    | n/a             | n/a       | n/a             |
| IL-1 $\beta$  | All groups                          | 261 | 77.88  | <0.001*         | 39.47  | <0.001*         | 5.33      | <0.001*         |
| IL-2          | All groups                          | 261 | 190.93 | <0.001*         | 6.68   | <0.001*         | 13.59     | <0.001*         |
| IL-4          | All groups                          | 261 | 29.09  | <0.001*         | 11.24  | <0.001*         | 6.76      | <0.001*         |
| IL-5          | Mm-UKY, Mm-Kenya, Mm-Wild, Ap       | 211 | 22.73  | <0.001*         | 10.03  | <0.001*         | 10.70     | <0.001*         |
| IL-6          | All groups                          | 261 | 76.89  | <0.001*         | 104.11 | <0.001*         | 15.06     | <0.001*         |
| IL-12         | All groups                          | 261 | 123.20 | <0.001*         | 10.42  | <0.001*         | 18.28     | <0.001*         |
| IL-17         | Mm-UKY, Mm-Kenya, Ap                | 177 | 598.63 | <0.001*         | 4.42   | <0.001*         | 17.55     | <0.001*         |
| CSF2          | Mm-UKY, Mm-Kenya, Mm-Wild, Ap       | 211 | 104.44 | <0.001*         | 21.36  | <0.001*         | 8.51      | <0.001*         |
| CCL2          | Mm-UKY, Mm-Kenya, Mm-Wild, Ap       | 211 | 72.96  | <0.001*         | 38.71  | <0.001*         | 5.23      | <0.001*         |
| CCL3          | All groups                          | 261 | 8.30   | <0.001*         | 160.11 | <0.001*         | 6.24      | <0.001*         |
| IFN $\gamma$  | Mm-Kenya, Mm-Wild, Ap               | 161 | 40.47  | <0.001*         | 2.42   | 0.030*          | 3.00      | <0.001*         |
| TNF $\alpha$  | All groups                          | 261 | 149.87 | <0.001*         | 81.32  | <0.001*         | 11.84     | <0.001*         |
| CXCL1         | Mm-UKY, Mm-Kenya, Mm-Wild, Ap       | 211 | 137.76 | <0.001*         | 201.75 | <0.001*         | 26.64     | <0.001*         |

826

827 **Supplemental Table 4:** One-way ANOVA analysis of tissue cytokine data to test for an effect of  
 828 group at D1, 2, 10 and 20. *P*-values indicate where at least one group is significantly different  
 829 from another group. Tukey-Kramer HSD post-hoc tests were used for pairwise comparisons and  
 830 are summarized in Figure 3 (See Supplemental File).  
 831

| Antigen      | Comparison                    | N | Day | F-Ratio | <i>P</i> -value |
|--------------|-------------------------------|---|-----|---------|-----------------|
| IL-1 $\beta$ | All groups                    |   | 1   | 5.39    | 0.002*          |
|              |                               |   | 2   | 32.52   | <0.001*         |
|              |                               |   | 10  | 20.70   | <0.001*         |
|              |                               |   | 20  | 19.05   | <0.001*         |
| IL-4         | All groups                    |   | 1   | 9.71    | <0.001*         |
|              |                               |   | 2   | 4.8     | 0.004*          |
|              |                               |   | 10  | 5.23    | 0.003*          |
|              |                               |   | 20  | 18.89   | <0.001*         |
| IL-6         | All groups                    |   | 1   | 14.56   | <0.001*         |
|              |                               |   | 2   | 47.24   | <0.001*         |
|              |                               |   | 10  | 23.30   | <0.001*         |
|              |                               |   | 20  | 21.50   | <0.001*         |
| IL-12        | All groups                    |   | 1   | 57.33   | <0.001*         |
|              |                               |   | 2   | 14.22   | <0.001*         |
|              |                               |   | 10  | 7.66    | <0.001*         |
|              |                               |   | 20  | 26.33   | <0.001*         |
| IL-17        | Mm-UKY, Mm-Kenya and Ap       |   | 1   | 45.87   | <0.001*         |
|              |                               |   | 2   | 93.60   | <0.001*         |
|              |                               |   | 10  | 441.78  | <0.001*         |
|              |                               |   | 20  | 116.93  | <0.001*         |
| CCL2         | Mm-UKY, Mm-Kenya, Mm-Wild, Ap |   | 1   | 21.55   | <0.001*         |
|              |                               |   | 2   | 33.43   | <0.001*         |
|              |                               |   | 10  | 7.04    | 0.002*          |
|              |                               |   | 20  | 11.68   | <0.001*         |
| TNF $\alpha$ | All groups                    |   | 1   | 39.61   | <0.001*         |
|              |                               |   | 2   | 54.97   | <0.001*         |
|              |                               |   | 10  | 27.95   | <0.001*         |
|              |                               |   | 20  | 67.67   | <0.001*         |
| CXCL1        | All groups                    |   | 1   | 60.99   | <0.001*         |
|              |                               |   | 2   | 210.02  | <0.001*         |
|              |                               |   | 10  | 15.23   | <0.001*         |
|              |                               |   | 20  | 9.54    | <0.001*         |

832  
 833

834 **Supplemental Table 5:** List of T cell phenotyping antibodies tried using flow cytometry in *Acomys*  
835 *cahirinus*.  
836

| Antigen | Clone    | Supplier         | Catalog# | Status                |
|---------|----------|------------------|----------|-----------------------|
| CD45    | OX-1     | BioLegend        | 202207   | No – no separation    |
|         | 30-F11   | BioLegend        | 103106   | No – no separation    |
|         | I3/2.3   | Molecular Probes | A15395   | No – no separation    |
| CD3     | 17A2     | BioLegend        | 100236   | Yes – good population |
| TCRab   | H57-597  | BioLegend        | 109207   | No – poor separation  |
|         | R73      | BioLegend        | 201107   | No – no separation    |
| TCRgd   | GL3      | BioLegend        | 118107   | No – poor separation  |
|         | VC7-13D5 | BioLegend        | 107507   | No – poor separation  |
| CD4     | GK1.5    | BioLegend        | 100433   | No – no separation    |
|         | RM4-4    | BioLegend        | 116011   | No – poor separation  |
| CD8     | 53-6.7   | BioLegend        | 100726   | No – no separation    |
| CD25    | P61      | BioLegend        | 102015   | No – poor separation  |
|         | 3C7      | BioLegend        | 101915   | No – no separation    |
| CD69    | H1.2F3   | BioLegend        | 104511   | No – poor separation  |
| CD196   | 29-2L17  | BioLegend        | 129813   | No – poor separation  |
|         | 140706   | BD Pharmingen    | 561753   | Yes – good population |
| CD206   | C068C2   | BioLegend        | 141705   | Yes – good population |
| CD49b   | HMa2     | BioLegend        | 103515   | Yes – good population |
|         | DX5      | BioLegend        | 108909   | No – poor separation  |

837

838



839 **Supplemental Figure 1 Comparison of parallelism for cytokine assays demonstrates ability**  
840 **to quantify cytokines across three species.** Serial dilution of serum (triangles, solid lines) and  
841 tissue lysate (squares, dashed lines) shows similar negative slopes for *M. musculus* (green), *A.*  
842 *percivali* (red) and *A. cahirinus* (blue) compared to the standard (black, circles, solid line). Data  
843 represent the mean for duplicates and lines are linear regressions calculated from all data that  
844 was above the lower limit of detection.

845  
846 **Supplemental Figure 2 Comparisons of amino acid sequence alignments for antigens in**  
847 **study.** Predicted amino acid sequence was translated from mRNA (*A. cahirinus*) or obtained  
848 from NCBI (*H. sapiens*, *M. musculus*, *R. rattus*) and aligned together using MAFFT. Figures  
849 were created using BOXSHADE where solid black shading is equivalent, gray shading is similar  
850 and no shading is dissimilar.

851

852 **Supplemental Files**

853

854 Supplemental File 1 contains summary tables of post-hoc multiple comparison tests used in  
855 Figure 1B, Figure 2 and Figure 3.

856

## 857 REFERENCES

- 858 1. Seifert, A.W., and Maden, M. (2014). New insights into vertebrate skin regeneration. In  
859 International review of cell and molecular biology, Volume 310. (Elsevier), pp. 129-169.
- 860 2. Martin, P. (1997). Wound healing--aiming for perfect skin regeneration. *Science* 276, 75-81.
- 861 3. Carlson, B.M. (2007). Principles of regenerative biology, (Amsterdam ; Burlington, Mass.:  
862 Elsevier/Academic Press).
- 863 4. Harty, M., Neff, A.W., King, M.W., and Mescher, A.L. (2003). Regeneration or scarring: an  
864 immunologic perspective. *Dev Dyn* 226, 268-279.
- 865 5. Seifert, A.W., and Muneoka, K. (2018). The blastema and epimorphic regeneration in mammals.  
866 *Dev Biol* 433, 190-199.
- 867 6. Eming, S.A., Wynn, T.A., and Martin, P. (2017). Inflammation and metabolism in tissue repair  
868 and regeneration. *Science* 356, 1026-1030.
- 869 7. Stoecklein, V.M., Osuka, A., and Lederer, J.A. (2012). Trauma equals danger--damage control by  
870 the immune system. *J Leukoc Biol* 92, 539-551.
- 871 8. Mescher, A.L. (2017). Macrophages and fibroblasts during inflammation and tissue repair in  
872 models of organ regeneration. *Regeneration (Oxf)* 4, 39-53.
- 873 9. Simkin, J., and Seifert, A.W. (2018). Concise Review: Translating Regenerative Biology into  
874 Clinically Relevant Therapies: Are We on the Right Path? *Stem Cells Transl Med* 7, 220-231.
- 875 10. Godwin, J.W., and Brookes, J.P. (2006). Regeneration, tissue injury and the immune response. *J*  
876 *Anat* 209, 423-432.
- 877 11. Aurora, A.B., Porrello, E.R., Tan, W., Mahmoud, A.I., Hill, J.A., Bassel-Duby, R., Sadek, H.A.,  
878 and Olson, E.N. (2014). Macrophages are required for neonatal heart regeneration. *J Clin Invest*  
879 *124*, 1382-1392.
- 880 12. Godwin, J.W., Pinto, A.R., and Rosenthal, N.A. (2013). Macrophages are required for adult  
881 salamander limb regeneration. *Proc Natl Acad Sci U S A* 110, 9415-9420.
- 882 13. Godwin, J.W., Debuque, R., Salimova, E., and Rosenthal, N.A. (2017). Heart regeneration in the  
883 salamander relies on macrophage-mediated control of fibroblast activation and the extracellular  
884 landscape. *NPJ Regen Med* 2.
- 885 14. Petrie, T.A., Strand, N.S., Yang, C.T., Rabinowitz, J.S., and Moon, R.T. (2014). Macrophages  
886 modulate adult zebrafish tail fin regeneration. *Development* 141, 2581-2591.
- 887 15. Simkin, J., Gawriluk, T.R., Gensel, J.C., and Seifert, A.W. (2017). Macrophages are necessary for  
888 epimorphic regeneration in African spiny mice. *Elife* 6.
- 889 16. Simkin, J., Sammarco, M.C., Marrero, L., Dawson, L.A., Yan, M., Tucker, C., Cammack, A., and  
890 Muneoka, K. (2017). Macrophages are required to coordinate mouse digit tip regeneration.  
891 *Development*.
- 892 17. Panduro, M., Benoist, C., and Mathis, D. (2018). Treg cells limit IFN-gamma production to  
893 control macrophage accrual and phenotype during skeletal muscle regeneration. *Proc Natl Acad*  
894 *Sci U S A*.
- 895 18. Hui, S.P., Sheng, D.Z., Sugimoto, K., Gonzalez-Rajal, A., Nakagawa, S., Hesselson, D., and  
896 Kikuchi, K. (2017). Zebrafish Regulatory T Cells Mediate Organ-Specific Regenerative  
897 Programs. *Dev Cell* 43, 659-672 e655.
- 898 19. Love, N.R., Chen, Y., Ishibashi, S., Kritsiligkou, P., Lea, R., Koh, Y., Gallop, J.L., Dorey, K.,  
899 and Amaya, E. (2013). Amputation-induced reactive oxygen species are required for successful  
900 *Xenopus* tadpole tail regeneration. *Nat Cell Biol* 15, 222-228.
- 901 20. Gauron, C., Rampon, C., Bouzaffour, M., Ipendey, E., Teillon, J., Volovitch, M., and Vriza, S.  
902 (2013). Sustained production of ROS triggers compensatory proliferation and is required for  
903 regeneration to proceed. *Sci Rep* 3, 2084.
- 904 21. Ferreira, F., Luxardi, G., Reid, B., and Zhao, M. (2016). Early bioelectric activities mediate  
905 redox-modulated regeneration. *Development* 143, 4582-4594.

- 906 22. He, L., and Marneros, A.G. (2013). Macrophages are essential for the early wound healing  
907 response and the formation of a fibrovascular scar. *Am J Pathol* 182, 2407-2417.
- 908 23. Nosbaum, A., Prevel, N., Truong, H.A., Mehta, P., Ettinger, M., Scharschmidt, T.C., Ali, N.H.,  
909 Pauli, M.L., Abbas, A.K., and Rosenblum, M.D. (2016). Cutting Edge: Regulatory T Cells  
910 Facilitate Cutaneous Wound Healing. *J Immunol* 196, 2010-2014.
- 911 24. Mirza, R., DiPietro, L.A., and Koh, T.J. (2009). Selective and specific macrophage ablation is  
912 detrimental to wound healing in mice. *Am J Pathol* 175, 2454-2462.
- 913 25. Goren, I., Allmann, N., Yogev, N., Schurmann, C., Linke, A., Holdener, M., Waisman, A.,  
914 Pfeilschifter, J., and Frank, S. (2009). A transgenic mouse model of inducible macrophage  
915 depletion: effects of diphtheria toxin-driven lysozyme M-specific cell lineage ablation on wound  
916 inflammatory, angiogenic, and contractive processes. *Am J Pathol* 175, 132-147.
- 917 26. Lucas, T., Waisman, A., Ranjan, R., Roes, J., Krieg, T., Muller, W., Roers, A., and Eming, S.A.  
918 (2010). Differential roles of macrophages in diverse phases of skin repair. *J Immunol* 184, 3964-  
919 3977.
- 920 27. Huo, Y., Qiu, W.Y., Pan, Q., Yao, Y.F., Xing, K., and Lou, M.F. (2009). Reactive oxygen species  
921 (ROS) are essential mediators in epidermal growth factor (EGF)-stimulated corneal epithelial cell  
922 proliferation, adhesion, migration, and wound healing. *Exp Eye Res* 89, 876-886.
- 923 28. Hopkinson-Woolley, J., Hughes, D., Gordon, S., and Martin, P. (1994). Macrophage recruitment  
924 during limb development and wound healing in the embryonic and foetal mouse. *J Cell Sci* 107 (  
925 Pt 5), 1159-1167.
- 926 29. Whitby, D.J., and Ferguson, M.W. (1991). Immunohistochemical localization of growth factors  
927 in fetal wound healing. *Dev Biol* 147, 207-215.
- 928 30. Martin, P., Dickson, M.C., Millan, F.A., and Akhurst, R.J. (1993). Rapid induction and clearance  
929 of TGF beta 1 is an early response to wounding in the mouse embryo. *Dev Genet* 14, 225-238.
- 930 31. Mescher, A.L., Neff, A.W., and King, M.W. (2013). Changes in the inflammatory response to  
931 injury and its resolution during the loss of regenerative capacity in developing *Xenopus* limbs.  
932 *PLoS One* 8, e80477.
- 933 32. Robert, J., and Ohta, Y. (2009). Comparative and developmental study of the immune system in  
934 *Xenopus*. *Dev Dyn* 238, 1249-1270.
- 935 33. Bertolotti, E., Malagoli, D., and Franchini, A. (2013). Skin wound healing in different aged  
936 *Xenopus laevis*. *J Morphol* 274, 956-964.
- 937 34. Brant, J.O., Yoon, J.H., Polvadore, T., Barbazuk, W.B., and Maden, M. (2016). Cellular events  
938 during scar-free skin regeneration in the spiny mouse, *Acomys*. *Wound Repair Regen* 24, 75-88.
- 939 35. Mak, K., Manji, A., Gallant-Behm, C., Wiebe, C., Hart, D.A., Larjava, H., and Hakkinen, L.  
940 (2009). Scarless healing of oral mucosa is characterized by faster resolution of inflammation and  
941 control of myofibroblast action compared to skin wounds in the red Duroc pig model. *J Dermatol*  
942 *Sci* 56, 168-180.
- 943 36. Szpaderska, A.M., Zuckerman, J.D., and DiPietro, L.A. (2003). Differential injury responses in  
944 oral mucosal and cutaneous wounds. *J Dent Res* 82, 621-626.
- 945 37. Chen, L., Arbieva, Z.H., Guo, S., Marucha, P.T., Mustoe, T.A., and DiPietro, L.A. (2010).  
946 Positional differences in the wound transcriptome of skin and oral mucosa. *BMC Genomics* 11,  
947 471.
- 948 38. Fini, M.E., and Sicard, R.E. (1980). Limb regeneration of the adult newt (*Notophthalmus*  
949 *viridescens*) in the absence of the spleen. *Wilehm Roux Arch Dev Biol* 189, 77-79.
- 950 39. Schotte, O.E., and Sicard, R.E. (1982). Cyclophosphamide-induced leukopenia and suppression  
951 of limb regeneration in the adult newt, *notophthalmus viridescens*. *J Exp Zool* 222, 199-202.
- 952 40. Gawriluk, T.R., Simkin, J., Thompson, K.L., Biswas, S.K., Clare-Salzler, Z., Kimani, J.M.,  
953 Kiama, S.G., Smith, J.J., Ezenwa, V.O., and Seifert, A.W. (2016). Comparative analysis of ear-  
954 hole closure identifies epimorphic regeneration as a discrete trait in mammals. *Nat Commun* 7,  
955 11164.

- 956 41. Seifert, A.W., Kiama, S.G., Seifert, M.G., Goheen, J.R., Palmer, T.M., and Maden, M. (2012).  
957 Skin shedding and tissue regeneration in African spiny mice (*Acomys*). *Nature* *489*, 561-565.
- 958 42. Matias Santos, D., Rita, A.M., Casanellas, I., Brito Ova, A., Araujo, I.M., Power, D., and  
959 Tiscornia, G. (2016). Ear wound regeneration in the African spiny mouse *Acomys cahirinus*.  
960 *Regeneration (Oxf)* *3*, 52-61.
- 961 43. Leshner, A., Li, B., Whitt, P., Newton, N., Devalapalli, A.P., Shieh, K., Solow, J.S., and Parker,  
962 W. (2006). Increased IL-4 production and attenuated proliferative and pro-inflammatory  
963 responses of splenocytes from wild-caught rats (*Rattus norvegicus*). *Immunol Cell Biol* *84*, 374-  
964 382.
- 965 44. Titus, R.G., Sherry, B., and Cerami, A. (1991). The involvement of TNF, IL-1 and IL-6 in the  
966 immune response to protozoan parasites. *Immunol Today* *12*, A13-16.
- 967 45. Viney, M., and Riley, E.M. (2017). The Immunology of Wild Rodents: Current Status and Future  
968 Prospects. *Front Immunol* *8*, 1481.
- 969 46. Julier, Z., Park, A.J., Briquez, P.S., and Martino, M.M. (2017). Promoting tissue regeneration by  
970 modulating the immune system. *Acta Biomater* *53*, 13-28.
- 971 47. Panduro, M., Benoist, C., and Mathis, D. (2018). Treg cells limit IFN-gamma production to  
972 control macrophage accrual and phenotype during skeletal muscle regeneration. *Proc Natl Acad*  
973 *Sci U S A* *115*, E2585-E2593.
- 974 48. Trinchieri, G., Pflanz, S., and Kastelein, R.A. (2003). The IL-12 family of heterodimeric  
975 cytokines: new players in the regulation of T cell responses. *Immunity* *19*, 641-644.
- 976 49. Weaver, C.T., Hatton, R.D., Mangan, P.R., and Harrington, L.E. (2007). IL-17 family cytokines  
977 and the expanding diversity of effector T cell lineages. *Annu Rev Immunol* *25*, 821-852.
- 978 50. Heinrich, P.C., Behrmann, I., Muller-Newen, G., Schaper, F., and Graeve, L. (1998). Interleukin-  
979 6-type cytokine signalling through the gp130/Jak/STAT pathway. *Biochem J* *334 ( Pt 2)*, 297-  
980 314.
- 981 51. Hunter, C.A., and Jones, S.A. (2017). Corrigendum: IL-6 as a keystone cytokine in health and  
982 disease. *Nat Immunol* *18*, 1271.
- 983 52. Tanaka, T., Narazaki, M., and Kishimoto, T. (2014). IL-6 in inflammation, immunity, and  
984 disease. *Cold Spring Harb Perspect Biol* *6*, a016295.
- 985 53. Kroeze, K.L., Boink, M.A., Sampat-Sardjoepersad, S.C., Waaijman, T., Scheper, R.J., and Gibbs,  
986 S. (2012). Autocrine regulation of re-epithelialization after wounding by chemokine receptors  
987 CCR1, CCR10, CXCR1, CXCR2, and CXCR3. *J Invest Dermatol* *132*, 216-225.
- 988 54. Lin, Z.Q., Kondo, T., Ishida, Y., Takayasu, T., and Mukaida, N. (2003). Essential involvement of  
989 IL-6 in the skin wound-healing process as evidenced by delayed wound healing in IL-6-deficient  
990 mice. *J Leukoc Biol* *73*, 713-721.
- 991 55. Gallucci, R.M., Simeonova, P.P., Matheson, J.M., Kommineni, C., Guriel, J.L., Sugawara, T.,  
992 and Luster, M.I. (2000). Impaired cutaneous wound healing in interleukin-6-deficient and  
993 immunosuppressed mice. *FASEB J* *14*, 2525-2531.
- 994 56. Devalaraja, R.M., Nanney, L.B., Du, J., Qian, Q., Yu, Y., Devalaraja, M.N., and Richmond, A.  
995 (2000). Delayed wound healing in CXCR2 knockout mice. *J Invest Dermatol* *115*, 234-244.
- 996 57. McFarland-Mancini, M.M., Funk, H.M., Paluch, A.M., Zhou, M., Giridhar, P.V., Mercer, C.A.,  
997 Kozma, S.C., and Drew, A.F. (2010). Differences in wound healing in mice with deficiency of  
998 IL-6 versus IL-6 receptor. *J Immunol* *184*, 7219-7228.
- 999 58. Wu, K.K. (1996). Cyclooxygenase 2 induction: molecular mechanism and pathophysiologic  
1000 roles. *J Lab Clin Med* *128*, 242-245.
- 1001 59. Penning, T.D., Talley, J.J., Bertenshaw, S.R., Carter, J.S., Collins, P.W., Docter, S., Graneto,  
1002 M.J., Lee, L.F., Malecha, J.W., Miyashiro, J.M., et al. (1997). Synthesis and biological evaluation  
1003 of the 1,5-diarylpyrazole class of cyclooxygenase-2 inhibitors: identification of 4-[5-(4-  
1004 methylphenyl)-3-(trifluoromethyl)-1H-pyrazol-1-yl]benzene nesulfonamide (SC-58635, celecoxib).  
1005 *J Med Chem* *40*, 1347-1365.

- 1006 60. Beura, L.K., Hamilton, S.E., Bi, K., Schenkel, J.M., Odumade, O.A., Casey, K.A., Thompson,  
1007 E.A., Fraser, K.A., Rosato, P.C., Filali-Mouhim, A., et al. (2016). Normalizing the environment  
1008 recapitulates adult human immune traits in laboratory mice. *Nature* 532, 512-516.
- 1009 61. Abolins, S., King, E.C., Lazarou, L., Weldon, L., Hughes, L., Drescher, P., Raynes, J.G., Hafalla,  
1010 J.C.R., Viney, M.E., and Riley, E.M. (2017). The comparative immunology of wild and  
1011 laboratory mice, *Mus musculus domesticus*. *Nat Commun* 8, 14811.
- 1012 62. Martin, P., and Leibovich, S.J. (2005). Inflammatory cells during wound repair: the good, the bad  
1013 and the ugly. *Trends Cell Biol* 15, 599-607.
- 1014 63. Pellegrino, M.J., and Habecker, B.A. (2013). STAT3 integrates cytokine and neurotrophin signals  
1015 to promote sympathetic axon regeneration. *Mol Cell Neurosci* 56, 272-282.
- 1016 64. Qin, S., Zou, Y., and Zhang, C.L. (2013). Cross-talk between KLF4 and STAT3 regulates axon  
1017 regeneration. *Nat Commun* 4, 2633.
- 1018 65. Zhu, H., Xiao, F., Wang, G., Wei, X., Jiang, L., Chen, Y., Zhu, L., Wang, H., Diao, Y., Wang, H.,  
1019 et al. (2016). STAT3 Regulates Self-Renewal of Adult Muscle Satellite Cells during Injury-  
1020 Induced Muscle Regeneration. *Cell Rep* 16, 2102-2115.
- 1021 66. Bard, J.D., Gelebart, P., Amin, H.M., Young, L.C., Ma, Y., and Lai, R. (2009). Signal transducer  
1022 and activator of transcription 3 is a transcriptional factor regulating the gene expression of  
1023 SALL4. *FASEB J* 23, 1405-1414.
- 1024 67. Grow, M., Neff, A.W., Mescher, A.L., and King, M.W. (2006). Global analysis of gene  
1025 expression in *Xenopus* hindlimbs during stage-dependent complete and incomplete regeneration.  
1026 *Dev Dyn* 235, 2667-2685.
- 1027 68. Neff, A.W., King, M.W., and Mescher, A.L. (2011). Dedifferentiation and the role of *sall4* in  
1028 reprogramming and patterning during amphibian limb regeneration. *Dev Dyn* 240, 979-989.
- 1029 69. Fairweather, M., Heit, Y.I., Buie, J., Rosenberg, L.M., Briggs, A., Orgill, D.P., and Bertagnolli,  
1030 M.M. (2015). Celecoxib inhibits early cutaneous wound healing. *J Surg Res* 194, 717-724.
- 1031 70. Romana-Souza, B., Santos, J.S., Bandeira, L.G., and Monte-Alto-Costa, A. (2016). Selective  
1032 inhibition of COX-2 improves cutaneous wound healing of pressure ulcers in mice through  
1033 reduction of iNOS expression. *Life Sci* 153, 82-92.
- 1034 71. Wilgus, T.A., Vodovotz, Y., Vittadini, E., Clubbs, E.A., and Oberyzyzyn, T.M. (2003). Reduction  
1035 of scar formation in full-thickness wounds with topical celecoxib treatment. *Wound Repair Regen*  
1036 11, 25-34.
- 1037 72. Hildebrand, F., Hubbard, W.J., Choudhry, M.A., Frink, M., Pape, H.C., Kunkel, S.L., and  
1038 Chaudry, I.H. (2006). Kupffer cells and their mediators: the culprits in producing distant organ  
1039 damage after trauma-hemorrhage. *Am J Pathol* 169, 784-794.
- 1040 73. Deshmane, S.L., Kremlev, S., Amini, S., and Sawaya, B.E. (2009). Monocyte chemoattractant  
1041 protein-1 (MCP-1): an overview. *J Interferon Cytokine Res* 29, 313-326.
- 1042 74. Low, Q.E., Drugea, I.A., Duffner, L.A., Quinn, D.G., Cook, D.N., Rollins, B.J., Kovacs, E.J., and  
1043 DiPietro, L.A. (2001). Wound healing in MIP-1alpha(-/-) and MCP-1(-/-) mice. *Am J Pathol* 159,  
1044 457-463.
- 1045 75. Ziraldo, C., Vodovotz, Y., Namas, R.A., Almahmoud, K., Tapias, V., Mi, Q., Barclay, D.,  
1046 Jefferson, B.S., Chen, G., Billiar, T.R., et al. (2013). Central role for MCP-1/CCL2 in injury-  
1047 induced inflammation revealed by in vitro, in silico, and clinical studies. *PLoS One* 8, e79804.
- 1048 76. Sierra-Filardi, E., Nieto, C., Dominguez-Soto, A., Barroso, R., Sanchez-Mateos, P., Puig-Kroger,  
1049 A., Lopez-Bravo, M., Joven, J., Ardavin, C., Rodriguez-Fernandez, J.L., et al. (2014). CCL2  
1050 shapes macrophage polarization by GM-CSF and M-CSF: identification of CCL2/CCR2-  
1051 dependent gene expression profile. *J Immunol* 192, 3858-3867.
- 1052 77. Lu, B., Rutledge, B.J., Gu, L., Fiorillo, J., Lukacs, N.W., Kunkel, S.L., North, R., Gerard, C., and  
1053 Rollins, B.J. (1998). Abnormalities in monocyte recruitment and cytokine expression in  
1054 monocyte chemoattractant protein 1-deficient mice. *J Exp Med* 187, 601-608.
- 1055 78. Godwin, J.W., and Rosenthal, N. (2014). Scar-free wound healing and regeneration in  
1056 amphibians: immunological influences on regenerative success. *Differentiation* 87, 66-75.



- 1057 79. Mescher, A.L., Neff, A.W., and King, M.W. (2017). Inflammation and immunity in organ  
1058 regeneration. *Dev Comp Immunol* 66, 98-110.
- 1059 80. Hirahara, K., and Nakayama, T. (2016). CD4+ T-cell subsets in inflammatory diseases: beyond  
1060 the Th1/Th2 paradigm. *Int Immunol* 28, 163-171.
- 1061 81. Barbul, A., Breslin, R.J., Woodyard, J.P., Wasserkrug, H.L., and Efron, G. (1989). The effect of  
1062 in vivo T helper and T suppressor lymphocyte depletion on wound healing. *Ann Surg* 209, 479-  
1063 483.
- 1064 82. Barbul, A., Shawe, T., Rotter, S.M., Efron, J.E., Wasserkrug, H.L., and Badawy, S.B. (1989).  
1065 Wound healing in nude mice: a study on the regulatory role of lymphocytes in fibroplasia.  
1066 *Surgery* 105, 764-769.
- 1067 83. Barbul, A., Sisto, D., Rettura, G., Levenson, S.M., Seifter, E., and Efron, G. (1982). Thymic  
1068 inhibition of wound healing: abrogation by adult thymectomy. *J Surg Res* 32, 338-342.
- 1069 84. Fishel, R., Barbul, A., Wasserkrug, H.L., Penberthy, L.T., Rettura, G., and Efron, G. (1983).  
1070 Cyclosporine A impairs wound healing in rats. *J Surg Res* 34, 572-575.
- 1071 85. Peterson, J.M., Barbul, A., Breslin, R.J., Wasserkrug, H.L., and Efron, G. (1987). Significance of  
1072 T-lymphocytes in wound healing. *Surgery* 102, 300-305.
- 1073 86. Zhang, J., Xiao, Z., Qu, C., Cui, W., Wang, X., and Du, J. (2014). CD8 T cells are involved in  
1074 skeletal muscle regeneration through facilitating MCP-1 secretion and Gr1(high) macrophage  
1075 infiltration. *J Immunol* 193, 5149-5160.
- 1076 87. Reinke, S., Geissler, S., Taylor, W.R., Schmidt-Bleek, K., Juelke, K., Schwachmeyer, V., Dahne,  
1077 M., Hartwig, T., Akyuz, L., Meisel, C., et al. (2013). Terminally differentiated CD8(+) T cells  
1078 negatively affect bone regeneration in humans. *Sci Transl Med* 5, 177ra136.
- 1079 88. Kwon, J., Devadas, S., and Williams, M.S. (2003). T cell receptor-stimulated generation of  
1080 hydrogen peroxide inhibits MEK-ERK activation and I $\kappa$ B serine phosphorylation. *Free Radic Biol*  
1081 *Med* 35, 406-417.
- 1082 89. Kim, H.R., Lee, A., Choi, E.J., Hong, M.P., Kie, J.H., Lim, W., Lee, H.K., Moon, B.I., and Seoh,  
1083 J.Y. (2014). Reactive oxygen species prevent imiquimod-induced psoriatic dermatitis through  
1084 enhancing regulatory T cell function. *PLoS One* 9, e91146.
- 1085 90. Kraaij, M.D., Savage, N.D., van der Kooij, S.W., Koekkoek, K., Wang, J., van den Berg, J.M.,  
1086 Ottenhoff, T.H., Kuijpers, T.W., Holmdahl, R., van Kooten, C., et al. (2010). Induction of  
1087 regulatory T cells by macrophages is dependent on production of reactive oxygen species. *Proc*  
1088 *Natl Acad Sci U S A* 107, 17686-17691.
- 1089 91. Haughton, C.L., Gawriluk, T.R., and Seifert, A.W. (2016). The Biology and Husbandry of the  
1090 African Spiny Mouse (*Acomys cahirinus*) and the Research Uses of a Laboratory Colony. *J Am*  
1091 *Assoc Lab Anim Sci* 55, 9-17.
- 1092 92. Plikaytis, B.D., Holder, P.F., Pais, L.B., Maslanka, S.E., Gheesling, L.L., and Carlone, G.M.  
1093 (1994). Determination of parallelism and nonparallelism in bioassay dilution curves. *J Clin*  
1094 *Microbiol* 32, 2441-2447.
- 1095 93. Tu, J., and Bennett, P. (2017). Parallelism experiments to evaluate matrix effects, selectivity and  
1096 sensitivity in ligand-binding assay method development: pros and cons. *Bioanalysis* 9, 1107-  
1097 1122.
- 1098 94. Mamrot, J., Legaie, R., Ellery, S.J., Wilson, T., Seemann, T., Powell, D.R., Gardner, D.K.,  
1099 Walker, D.W., Temple-Smith, P., Papenfuss, A.T., et al. (2017). De novo transcriptome assembly  
1100 for the spiny mouse (*Acomys cahirinus*). *Sci Rep* 7, 8996.
- 1101 95. Katoh, K., Misawa, K., Kuma, K., and Miyata, T. (2002). MAFFT: a novel method for rapid  
1102 multiple sequence alignment based on fast Fourier transform. *Nucleic Acids Res* 30, 3059-3066.
- 1103 96. Katoh, K., Rozewicki, J., and Yamada, K.D. (2017). MAFFT online service: multiple sequence  
1104 alignment, interactive sequence choice and visualization. *Brief Bioinform.*
- 1105 97. Whitcomb, B.W., and Schisterman, E.F. (2008). Assays with lower detection limits: implications  
1106 for epidemiological investigations. *Paediatr Perinat Epidemiol* 22, 597-602.

- 1107 98. Rueden, C.T., Schindelin, J., Hiner, M.C., DeZonia, B.E., Walter, A.E., Arena, E.T., and Eliceiri,  
1108 K.W. (2017). ImageJ2: ImageJ for the next generation of scientific image data. BMC  
1109 Bioinformatics *18*, 529.  
1110



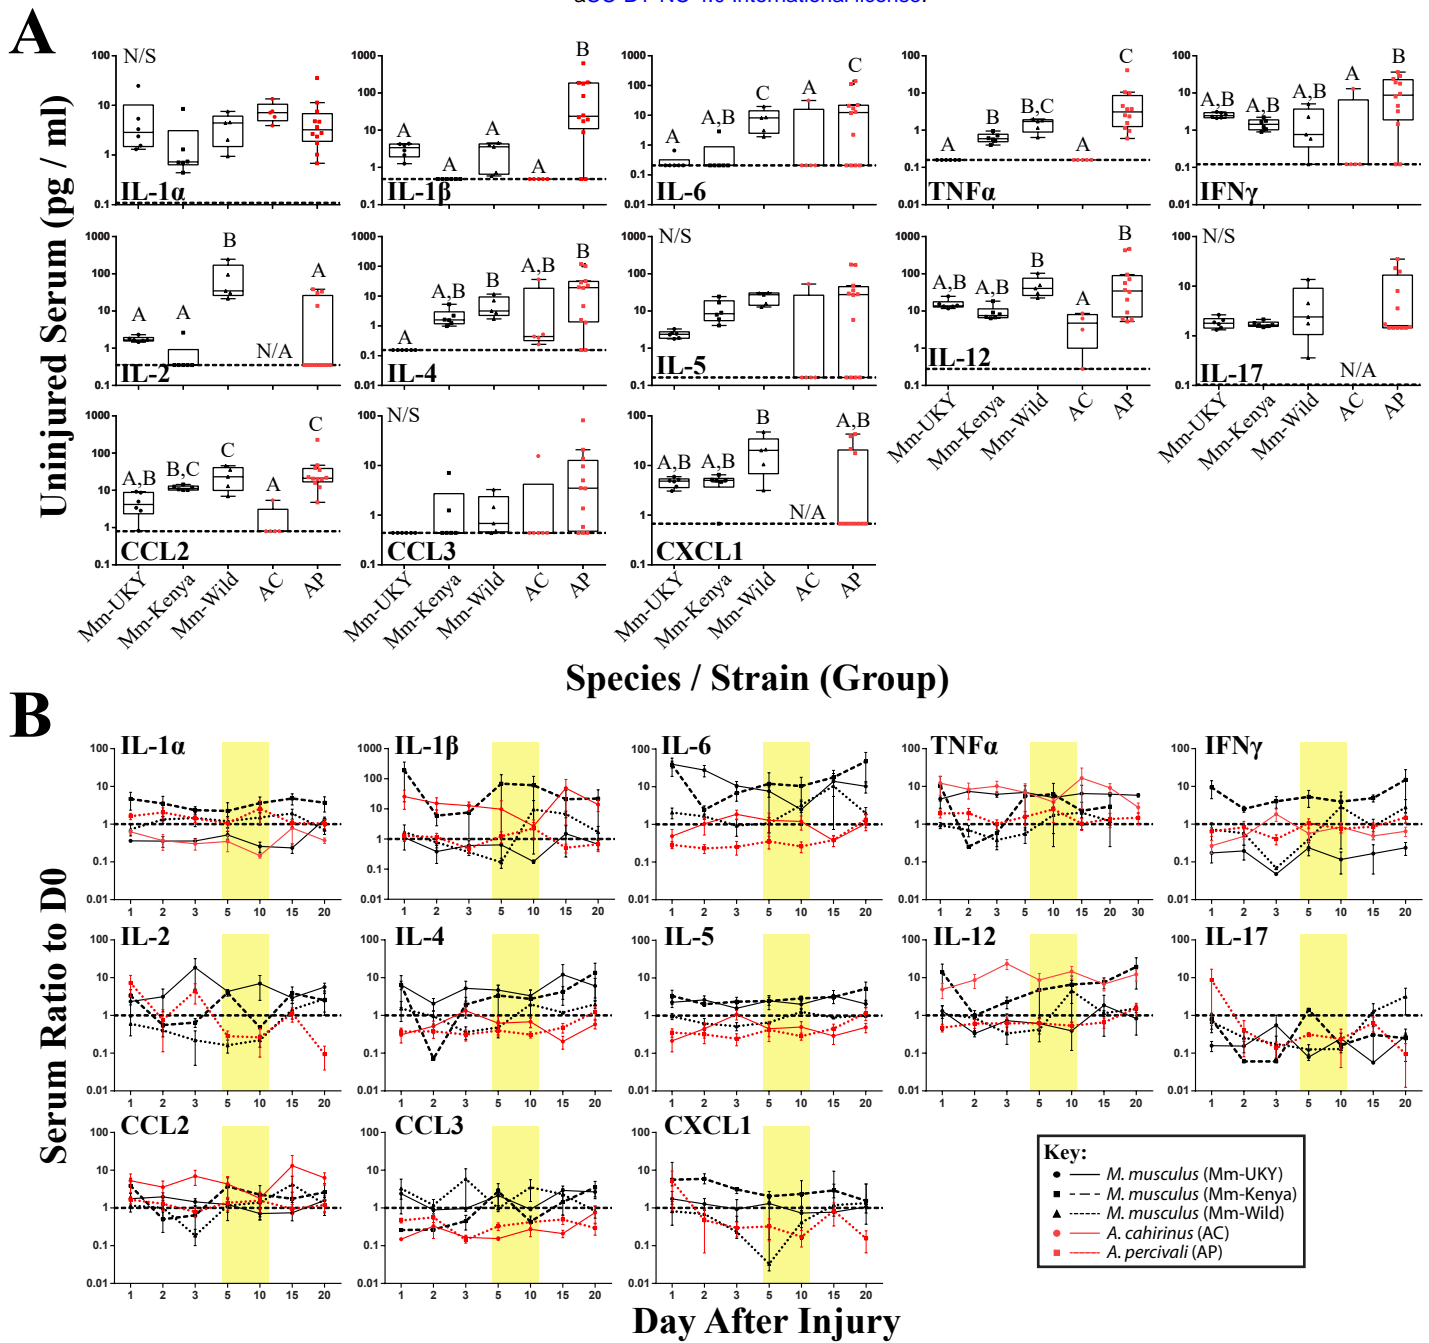

**Figure 1 Ability to regenerate and immunity-status are associated with a specific systemic immune profile and immune response to injury.** (a) Comparison of cytokine concentrations in serum from uninjured animals showed higher concentrations of IL-4, IL-6, CCL2 and TNF $\alpha$  in wild-caught animals compared to laboratory-reared animals indicated that wild animals have a “primed” immune system. No difference was found between non-regenerators (Mm-UKY, Mm-Kenya and Mm-Wild) and regenerators (Ac and Ap). Data represent box and whiskers with median, interquartile range and individual data points. N/A denotes concentrations could not be quantified in any animal of the group. The dashed line in each graph represents the lower limit of detection for the specific cytokine. N/S denotes P>0.05 for One-way ANOVA (See Supplemental Table 1) and different letters above the data denotes P $\leq$ 0.05 for Tukey-Kramer pairwise comparisons (See Supplemental File). (b) The change in systemic cytokines compared to D0 over 20 days after ear hole punch. A naïve immune system response (solid lines) was consistent with increased IL-2 and TNF $\alpha$ , and decreased IL-1 $\alpha$  compared to a primed response (intermittent lines) (See Supplemental Table 2). Non-regenerators (black) showed increases in IL-5, IL-6, IL-17, CCL3 and CXCL1 compared to regenerators (red). Data represent mean and S.E.M. for at least n=5 animals per timepoint. The dashed line at Y=1 represents no change compared to D0 and the yellow boxes represent the inflammation resolution window.

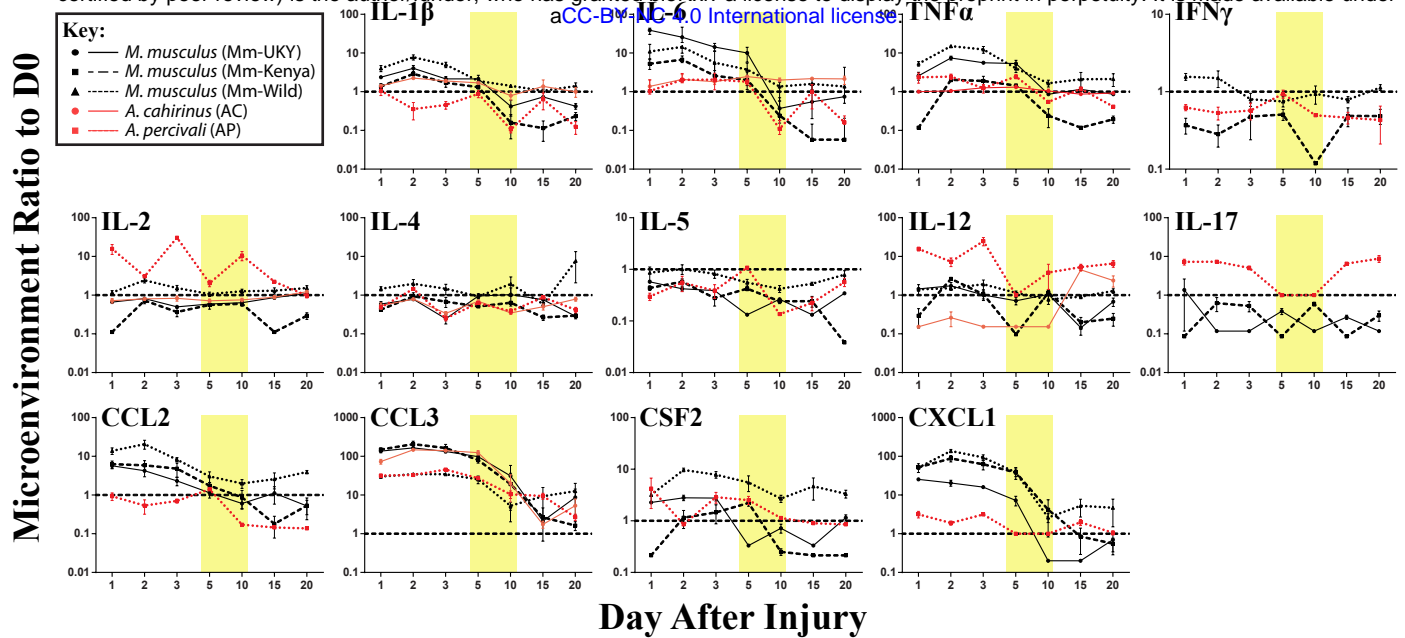

**Figure 2 The tissue microenvironment is dynamic, and the ability to regenerate is associated with a specific immune response to injury.** The comparison of the change in cytokines from tissue lysate compared to D0 over 20 days after ear hole punch. All cytokines varied over time and between groups (See Supplemental Table 3). There was a stronger increase in CCL3 a muted increase for IL-12 and CXCL1 in immune-naïve (solid lines) compared to immune-primed animals (intermittent lines). Non-regenerators (black) had stronger increases for IL-6, CCL2 and CXCL1 compared to regenerators (red). Additionally, IL-17 decreased in non-regenerators and increased in regenerators. Data represent mean and S.E.M. for at least n=5 animals per species per timepoint. The dashed line at Y=1 represents no change compared to D0 and the yellow boxes represent the inflammation resolution window.

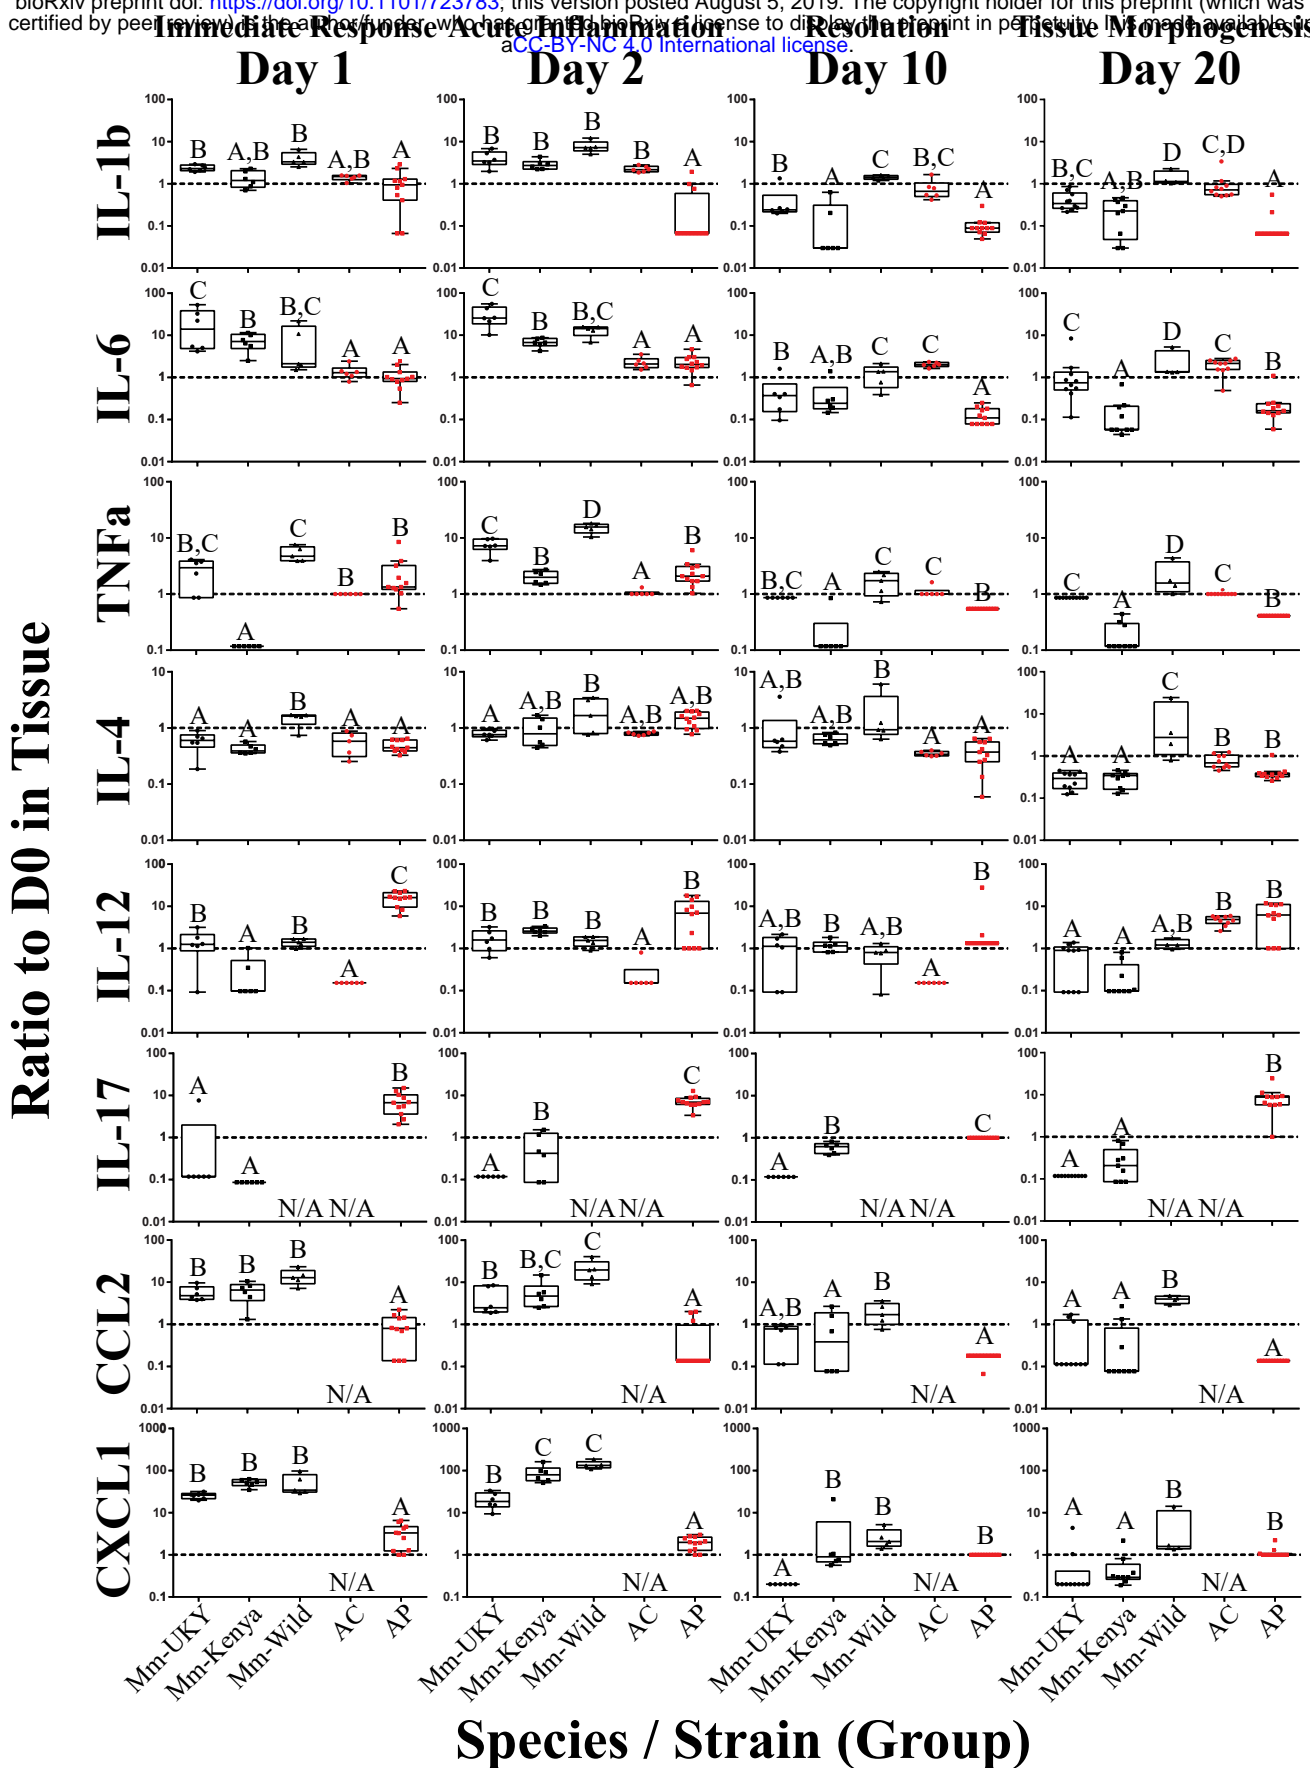

**Figure 3 Regeneration is associated with specific temporal cytokine responses in the tissue microenvironment.** The comparison of the change in cytokines from tissue lysate compared to baseline. Non-regenerators (Mm-UKY, Mm-Kenya, and Mm-Wild: Black) show a stronger response compared to regenerators (Ac and Ap: Red) for several inflammatory cytokines during the immediate response, acute inflammatory phase. These differences mostly resolved at day 10 and 20. In contrast, regenerators showed a stronger IL-12 and IL-17 response during tissue morphogenesis. Data represent box and whiskers with median, interquartile range and individual data points. N/A denotes concentrations could not be quantified. The dashed line at Y=1 represents no change compared to D0. Each graph showed P<0.05 for effect of group using a One-way ANOVA on log-transformed data (See Supplemental Table 4) and different letters above each group denotes P<0.05 for Tukey-Kramer pairwise comparisons (See Supplemental File).

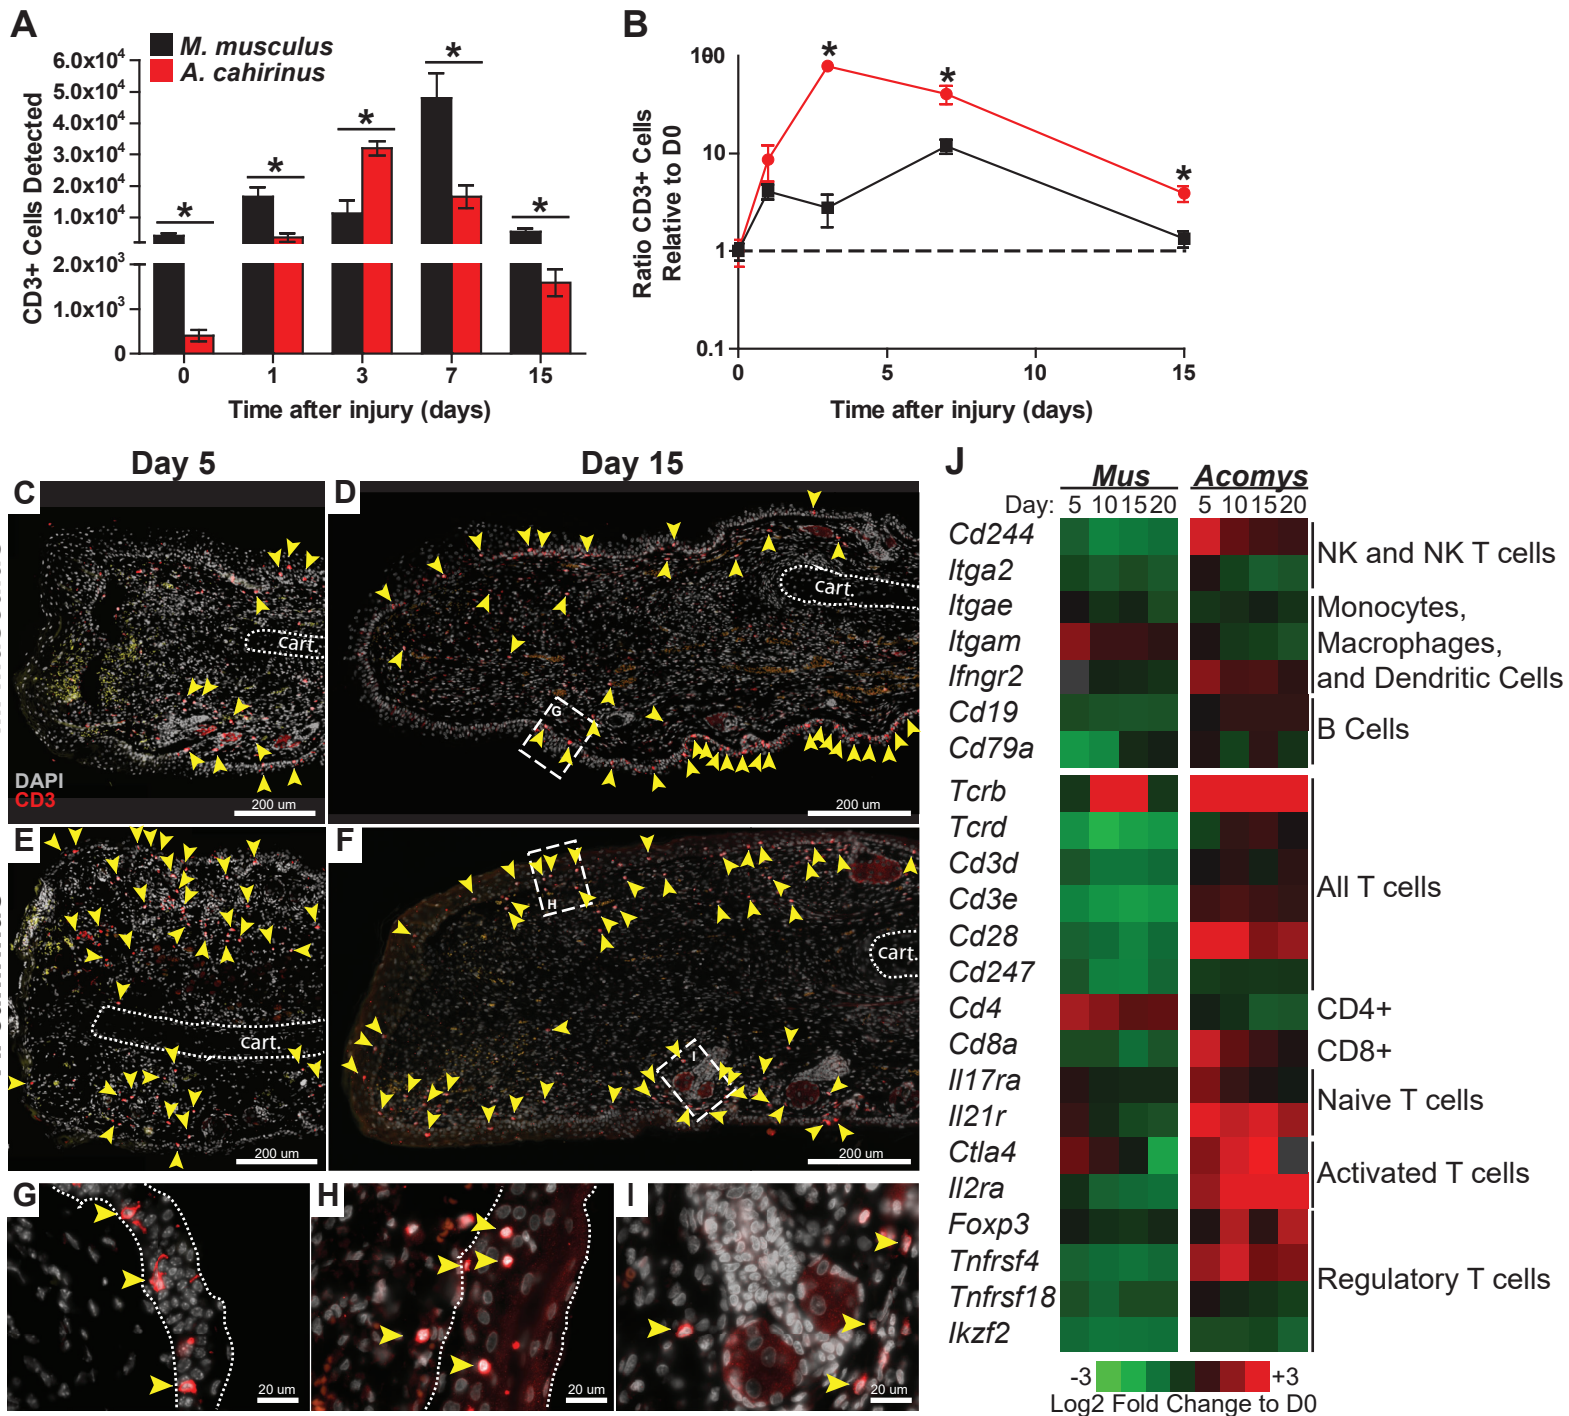

**Figure 4 The regeneration microenvironment is primed by greater T cell influx and TREG signature.**

(A) Comparison of total CD3<sup>+</sup> cells quantified by flow cytometry from disassociated ear pinna and (B) the ratio relative to uninjured tissue for *M. musculus* (black) and *A. cahirinus* (red). Data represent mean and S.E.M. and n=4 or 5. An \* denotes P<0.05 for pairwise comparison within the day between species for Holm-Sidak posthoc test.

(C-I) Representative immunohistochemistry for CD3 (red) counterstained with DAPI (gray) at the proximal wound margin (amputation plane can be determined from the end of the cartilage—indicated by the dotted line) from D5 and D15 after injury of *M. musculus* (C, D) and *A. cahirinus* (E, F). More T cells (yellow arrowhead) were present throughout the wound bed and were mainly found in the dermis of *A. cahirinus* compared to *M. musculus*. The T cells associated with epidermis (boundaries indicated by the dotted line) tended to be spindle-like in *M. musculus* (G), while rounded in *A. cahirinus* (H). The dermal T cells in *A. cahirinus* also tended to be in close proximity to regenerating epidermal appendages (I). N=4 and bar equals 200  $\mu$ m (C-F) or 20  $\mu$ m (G-I). (J) Heatmap of differential gene expression compared to uninjured tissue suggests that the regeneration microenvironment contains a substantial NK, CD8<sup>+</sup> and TREG cell response while fibrotic repair has a CD4<sup>+</sup> cell response. Data comes from a previously published analysis [34].



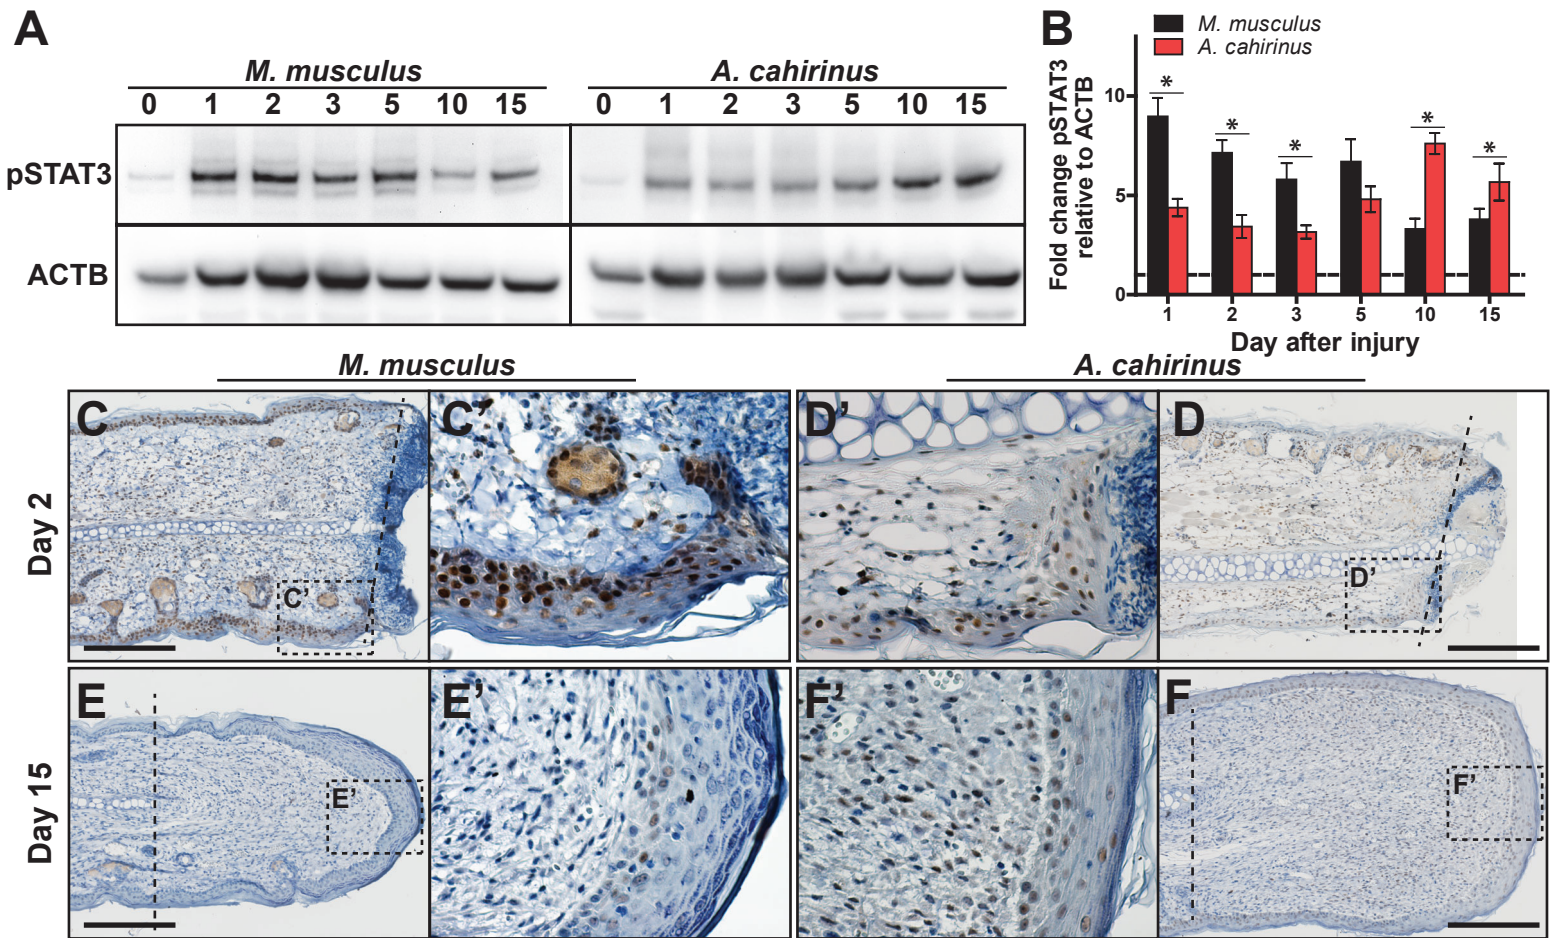

**Figure 5 Postponed STAT3 activation in the blastema is associated with regeneration.** (A-B) Comparison of representative immunoblots for pSTAT3 and ACTB for indicated time and species from injured tissue homogenate from ear-hole punch assay (A). Fibrotic repair is associated with strong early STAT3 activation while regeneration is associated with a weak early and strong postponed activation (B). Data represent mean fold change of pSTAT3 intensity normalized to ACTB intensity and relative to D0 and S.E.M. n=4 individuals per time point and species (B). (C-F) Representative images for immunohistochemistry for pSTAT3 (Brown) counterstained with hematoxylin (Blue) for *M. musculus* (C, C', E and E') and *A. cahirinus* (D, D', F and F') at the indicated time points. On D2 after injury, nearly every epidermal cell in *M. musculus* was positive compared to about half in *A. cahirinus* (C, D). On D15 after injury, only a small population of epidermal cells in *M. musculus* were positive compared to about half in *A. cahirinus* (E, F). Additionally, about half of the cells in the forming blastema remain positive at D15. Data represent n=3, and bar equals 200  $\mu$ m.

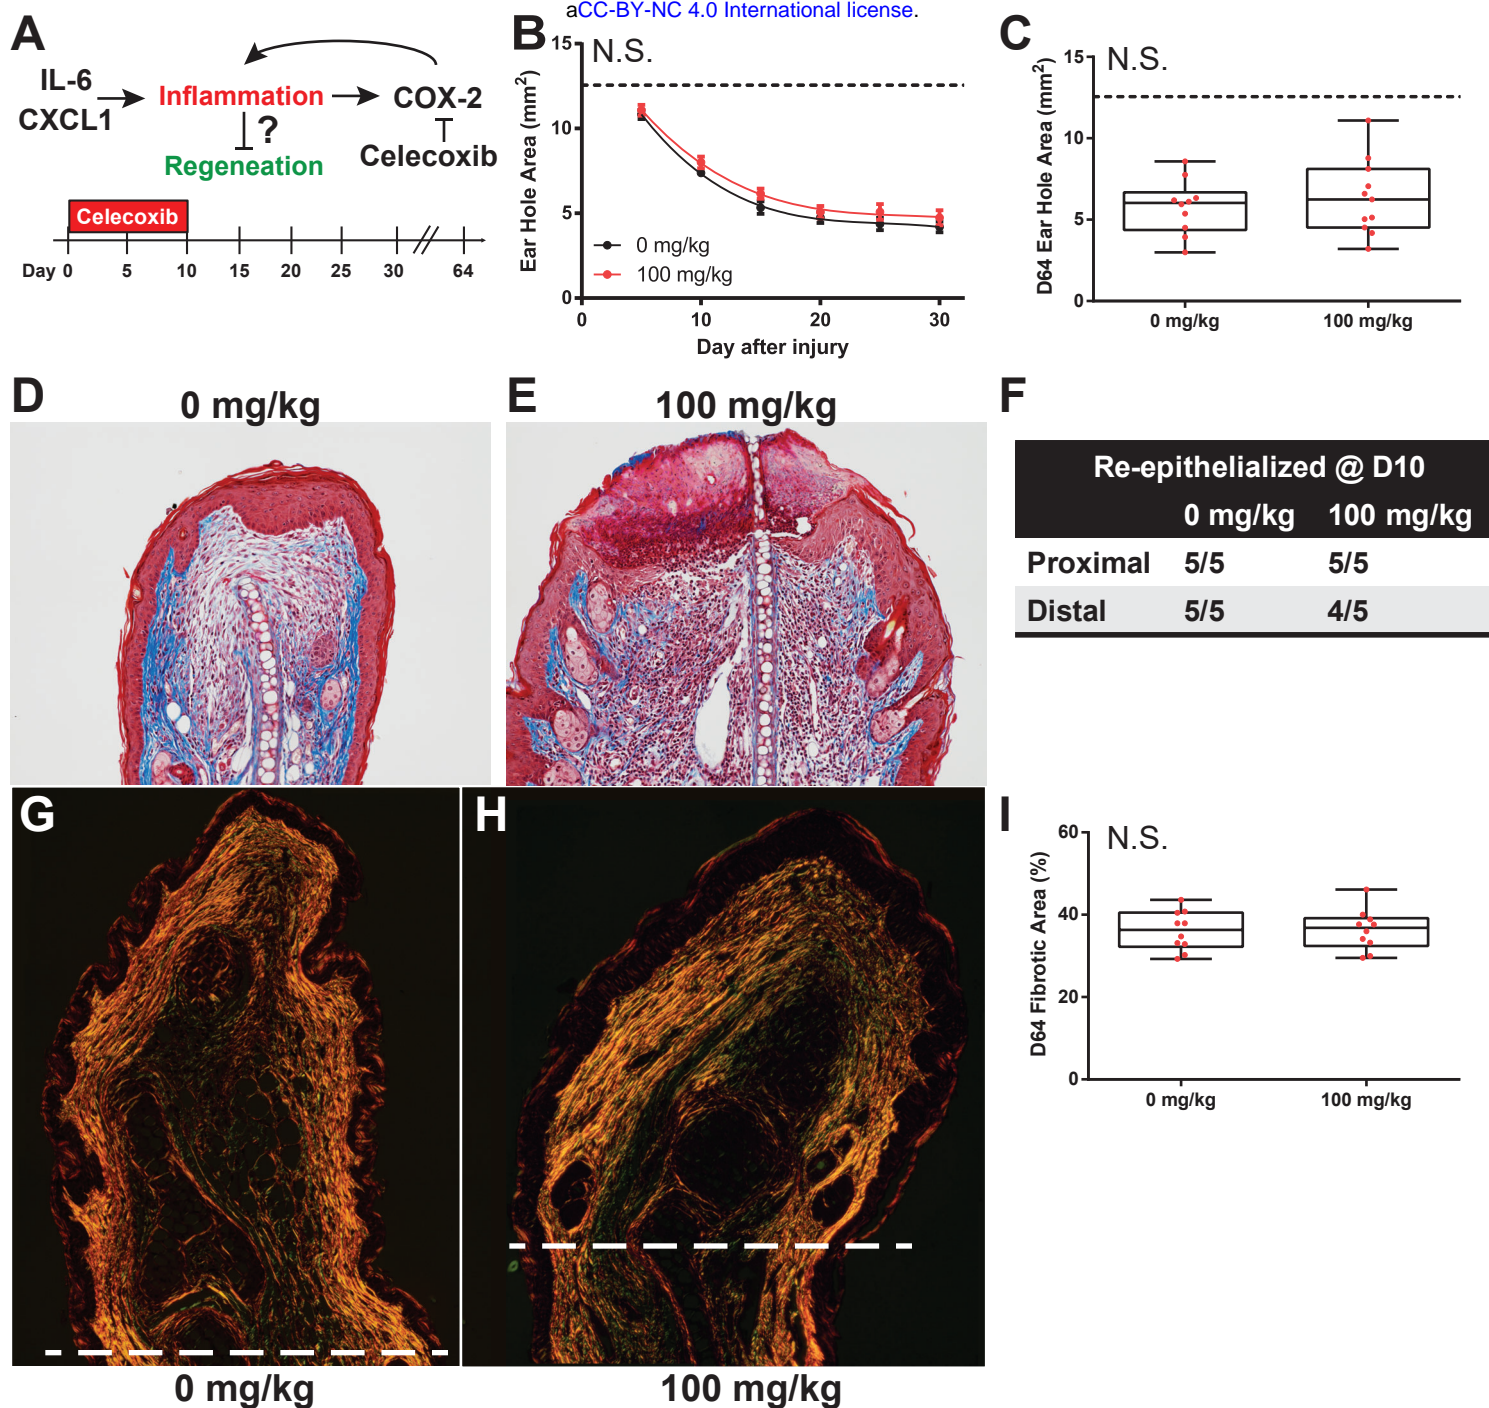

### Figure 6 COX-2 Inhibition does not liberate regeneration in *M. musculus*.

(A) Celecoxib treatment during the first 10 days of injury reduces secondary inflammation caused by IL-6 and CXCL1. (B-C) Celecoxib treatment did not affect the rate of ear-hole closure from D5 to D30 (B), or ear-hole area at D64 (C). (D-F) Mason's trichrome stain on D10 ear tissue from control (D) and treatment (E) showed 20% of the distal injury plane from treated ears were not re-epithelialized, while 100% of control treated ears and the proximal injury plane were re-epithelialized (F). (G-I) Picro-sirius stain on D64 ear tissue from control (G) and treatment (H) showed no difference in the total collagen fibrotic area distal to the amputation plane (I). N.S. indicates not significant for comparison between groups. Data represent mean  $\pm$  S.E.M. and the lines represent cubic regression for  $n=10$  per treatment (B), OR individual data (red dots) and median and interquartile range for  $n=10$  per treatment (C, I).

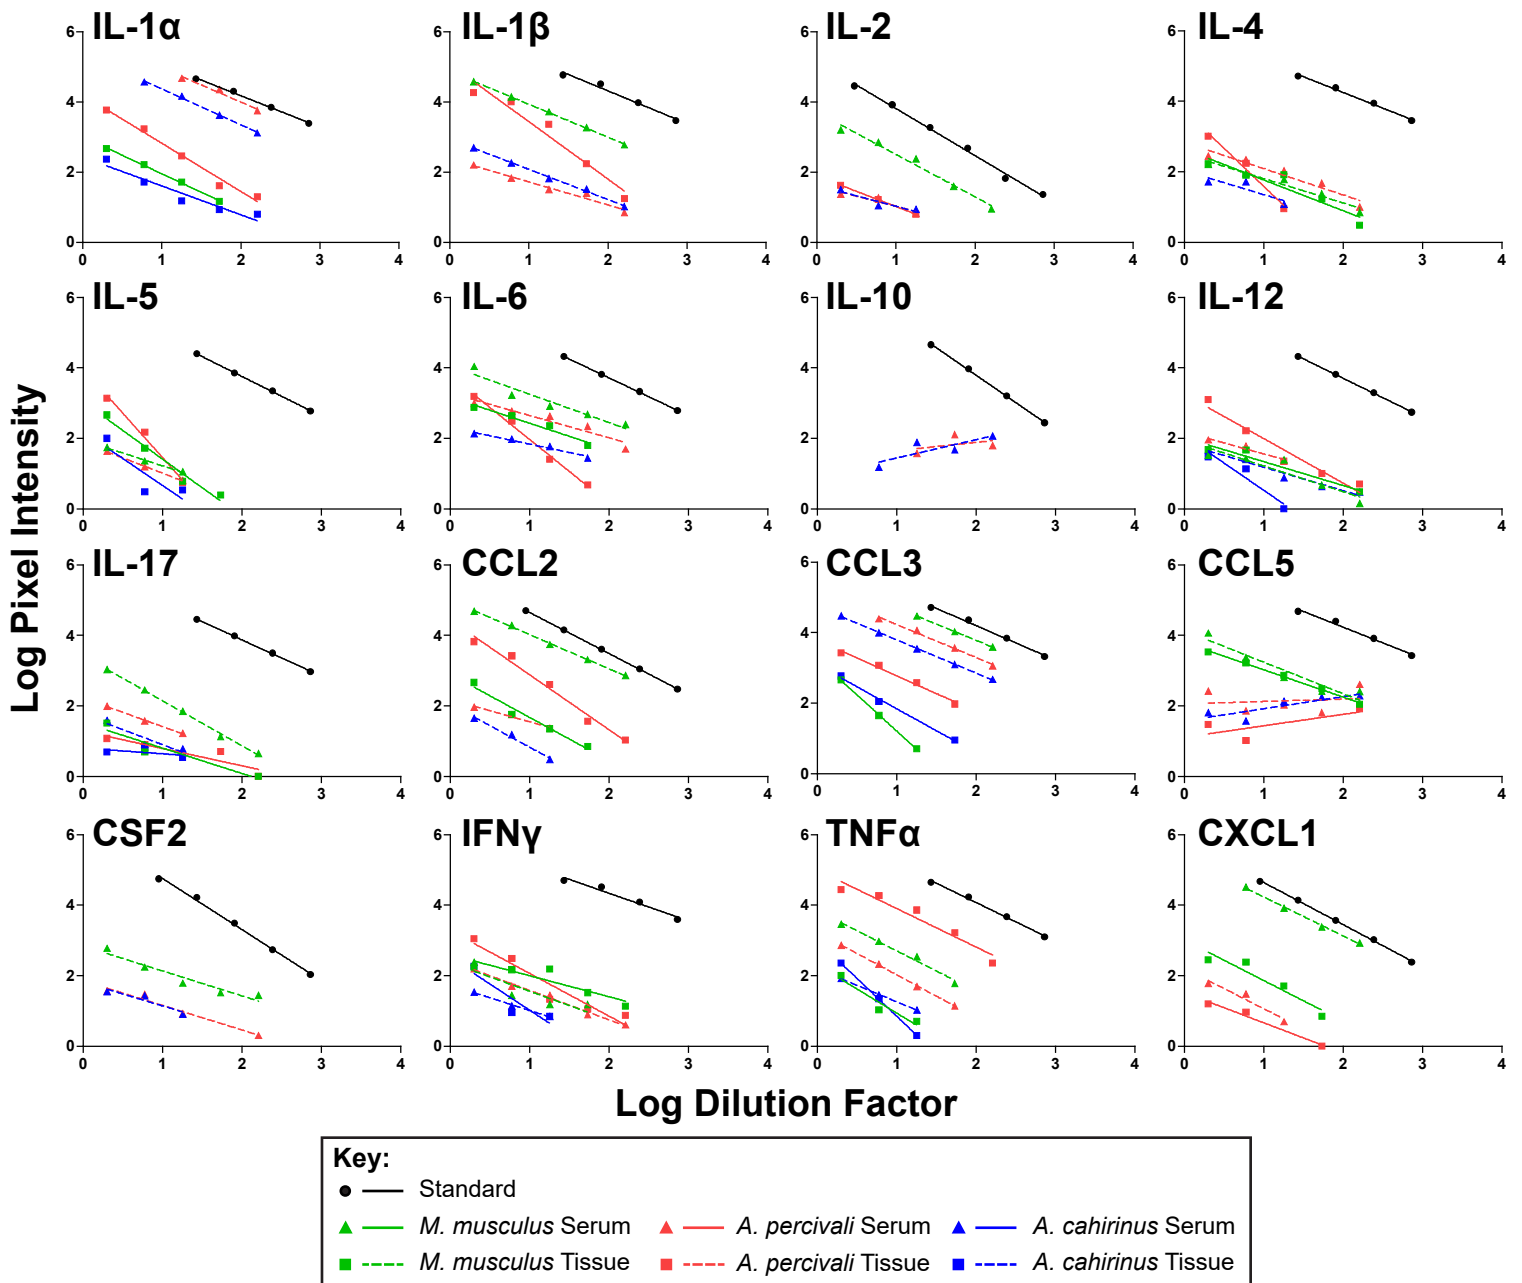

**Supplemental Figure 1 Comparison of parallelism for cytokine assays demonstrates ability to quantify cytokines across three species.** Serial dilution of serum (triangles, solid lines) and tissue lysate (squares, dashed lines) shows similar negative slopes for *M. musculus* (green), *A. percivali* (red) and *A. cahirinus* (blue) compared to the standard (black, circles, solid line). Data represent the mean for duplicates and lines are linear regressions calculated from all data that was above the lower limit of detection.



## Supplemental Figure 1a

### IL-1 $\alpha$

#### MAFFT Alignment

```
Homo      1  MAKVPDVFEDLKNCYSENEEDSSSIDHLSLNQKSFYHVSYGPELHEGCMQDQSVLSISETS
Mus       1  MAKVPDLFEDLKNCYSENEEYSSAIDHLSLNQKSFYDASYGSLHETCTDQFVSLRTSETS
Rattus   1  MAKVPDLFEDLKNCYSENEEYSSAIDHLSLNQKSFYDASYGSLHENCTDKFVSLRTSETS
Acomys   1  MAKVPDLFEDLKNCYSENEEYSSAIDHLSLNQKSFYDASYGSGPEHCTAKLVSRRASETS

Homo     61  KTSKLTFFKESMVVV---ATNGKVLKKRRLSLSOSITDDLEAIAANDSEEEITKPRSAFVS
Mus      61  KMSNFTFKESRVTVSATSSNGKILKKRRLSFSSETFEDDLQSTTHD-LEETIQPRSAFYT
Rattus   61  KMSFTFFKESRVVVSATSNKGLKKRRLSFPFTEDDLEAIAHD-LEETIQPRSAFHS
Acomys   61  KKSNTFFKESLVMVSATANEKGLKKRRLSFPQAFDEDDLEAIAHN-LEETIQPRSAFYS

Homo    118  FLSNVKYNFMRIIKYEFILNDALNQSIIRANDQ-YLTAALHNLDEAVKFDMGAYKSSKD
Mus     120  YQSDIRYKLMKLVKQKFVFNDSLNQTIYQDVKHYLSTTWLNDLQEQEVKFDMYAYSSGGD
Rattus  120  FQNNIRYKLIIRIVKQEFIMNDSLNQNIYVDMDRTHLKAASLNDLQLEVKFDMYAYSSGGD
Acomys  120  FQHNVRKLIIRIKQEFILNDPLNQNIYLDPNVHLKAASLTDLQHEVKFDMYAYSS-GD

Homo    177  DAKITVILRISKTLQLYVTAQDEDQPVLLKEMPEIPKLTITGSETNLIFFWEITHGKKNYFTS
Mus     180  DSKYPVTLKISDSQLFVSAQGEDQPVLLKEIPETPKLITGSETDLIFFWKSINSKNYFTS
Rattus  180  DSKYPVTLKVSNTQLFVSAQGEDKPVLLKEIPETPKLITGSETDLIFFWEKINSKNYFTS
Acomys  179  DSKYPVTLKISNTQLFVSAQGEDQPVLLKEMPEIPKLTITGSETNLIFFWKSINSKNYFTS

Homo    237  VAHPNLFIAATKQDYWVCLAGGPPSITDFQILENQA
Mus     240  AAYPELFIAATKEQSRVHLARGLPSTDFQI----S
Rattus  240  AAPELFIATKEQSQVHLARGLPSTDFQI----S
Acomys  239  AAYPELFIAATKEQSRVHLARGLPSTDFQI----A
```



## Supplemental Figure 1b

### IL-1 $\beta$

#### MAFFT Alignment

```
Homo      1 MAEVPELASEMMAYSGNEDDLFFEADGPKQMKCSFQDLDLCPLDGGIQLRISDHHYSKG
Mus       1 MATVPELNCEMPPFDS-DENDLFFEVDGPQKMGCFQTFDLGCPDESIQLQISQQHINKS
Rattus    1 MATVPELNCEIAAFDS-EENDLFFEADRPQKIKDCFQALDLGCPDESIQLQISQQHLDKS
Acomys    1 MATVPELNSEVTAFHS-DKNDLFFEVDRPQKMKSCLQTLDLGSPDESIQLQISQQHFNKS

Homo      61 FRQAASVVVAMDKLRKMLVPCQTFQENDLSTFFPFIFEEEPIFFDIWDNEA--YVHDAP
Mus       60 FRQAVSLIVAVEKLWQLPVSFPWTFQEDDMSTFFSFIFEEEPILCDSWDDDDNLLVCDVP
Rattus    60 FRKAVSLIVAVEKLWQLPMSCPWSFQDEDPSTFFSFIFEEEPVLCDSWDDDD-LLVCDVP
Acomys    60 FRQVVSLFVAVEKLWNIPVACPWTFQEDDLGTFFSFIFEEEHILSDSWDEEQ--LVCDVA

Homo      119 VRSINCTLRDSQQKSLVMSGPYELKALHLQGDMEQQVVFSMSFVQGEESNDKIPVALGL
Mus       120 IRQLHYRRLRDEQQKSLVLSDPYELKALHLNGQINQQVIFSMSFVQGEPSNDKIPVALGL
Rattus    119 IRQLHCRRLRDEQQKCLVLSDPCELKALHLNGQISQQVVFSMSFVQGETSSNDKIPVALGL
Acomys    118 IRQLHCRRLRDEQQKCLVLSDPCELKALHLNGENINQVVFSMSFVHGETSINKIPVALGL

Homo      179 KEKNLYLSCVIKDDKPTLQLESVDPKNYPKKKMEKRFVFNKIEINNKIEFESAQFPNWYI
Mus       180 KGKNLYLSCVMKDGTPTLQLESVDPKQYPKKKMEKRFVFNKIEVKSKVEFESAQFPNWYI
Rattus    179 KGKNLYLSCVMKDGTPTLQLESVDPKQYPKKKMEKRFVFNKIEVKSKVEFESAQFPNWYI
Acomys    178 KGKNLYLSCVMKDGKPTLQLESVDPKQYPKKKMEKRFVFNKIETKSKVEFESAQFPNWYI

Homo      239 STSQAENMPVFLGGTKGQDITDFTMQFVSS
Mus       240 STSQAEHKPVFL-GNNSGQDIDFTMESVSS
Rattus    239 STSQAEHRPVFL-GNSNGRDIVDFTMEPVSS
Acomys    238 STSQAEHKPVFL-GNNSGQDIVDFTMESVSS
```

## Supplemental Figure 1c

### IL-2

---

#### MAFFT Alignment

```
Homo 1 MYRMQLLSCTIALSLALVTNSAPTSSST-----KKTQLQLEHLLLDLQMIIN
Mus 1 MYSMQLASCVTLLTLVLLVNSAPTSSSTSSSTAEAQQQQQQQQQQQQHLEQLLMDLQELLS
Rattus 1 MYSMQLASCVALTLVLLVNSAPTSSPA-----KETQQHLEQLLLDLQVLLR
Acomys 1 MYSMQLASCVALTLVLLVNSAPTSSST-----EETGQHLEQLLLDLQVLER
```

```
Homo 47 GINNYKNPKLTRMLTFKFYMPKKATELKHLCLEEEELKPLEEVNLAQSKNFHLR-PRDL
Mus 61 RMENYRNLKLPRLTFKFYLPKQATELKDLCLEDELGPIRQVLDLTQSKSFOLEDAENF
Rattus 47 GIDNYKNLKLPMMLTFKFYLPKQATELKHLCLEENELGALQFVLDLTQSKSFHLEDAGNF
Acomys 47 GINNYKNPKLPMMLRFKFYMPKATELKHLCLEEEELGALQSVLDLNQSKSFYLEDTGNF
```

```
Homo 106 ISNINVLIVLELKGSETTFMCEYADETATIVEFLNRWITFCQSIISTLT-
Mus 121 ISNIRVTVVKLKGSNTFECQFDDESATVVDFLRRWIAFCQSIISTSPQ
Rattus 107 ISNIRVTVVKLKGSSENKFEQCFDDEPATVVEFLRRWIAICQSIISTMTQ
Acomys 107 INNIRVTVVKLKGSNTFKCKFDDEPVTVVVELLSRWIAFCQSAISTMIQ
```

## Supplemental Figure 1d

### IL-4

---

#### MAFFT Alignment

```
Homo 1 MGLTSQLLPPLFFLLACAGNFVHGKCDITLQEIIRKTLNSITEQKTLCTELTVTDIFAAS
Mus 1 MGLNPQLVVIILFFLECTRSHIHGCD-KNHLREIIGILNEVTGEGTPCTEMDVPNVLTAT
Rattus 1 MGLSPHLAVTILFCFLICTGNGIHGCV-DSPLREIINTLNQVTEKGTPTCEMFPDVLAT
Acomys 1 MGLRPQLATVLLCFLACTGDYIHGHN-DTALKEIHTLNQVTEKGTPTCEMVVPDVLAT
```

```
Homo 61 KNTTEKETFCRAATVLRQFYSHHEKDTKCLGATAQQFHRHKQLIRFLKRLDRNLWGLAGL
Mus 60 KNTTESELVCRASKVLRIFYLKHGK-TPCL-----KKNSSVLMELQRLFRFRCLDSS
Rattus 60 RNTTENELICRASRVLRKFYFPRDV-PPCL-----KNKSGVLGELRKLRCGVSGLNLSL
Acomys 60 KNSTEKELLCRASRVLRKFYFPHEV-TLCL-----KNNPKVLKDLKLSRGISSLYPL
```

```
Homo 121 NSCPVKEANQSTLENFLERLKIIMREKYSKCS---S
Mus 112 ISCTMNESKSTSLKDFLESLSKSIQMMDYS-----
Rattus 112 RSCTVNESTLTTLKDFLESLSKSIIRGKYLSQCTSMS
Acomys 112 ESCTVNESSYTTLKDFLERLRRIVQKKYCQC-----
```

## Supplemental Figure 1e

### IL-5

---

#### MAFFT Alignment

```
Homo      1  M-RMLLHLSL LALGAAYVYAIPT EIP T S A I V K E T L A L L S T H R T L L I A N E T I R I P V P V H K N
Mus       1  MRRMLLHLSV L T L S C -- V W A T A M E I P M S T V V K E T L I Q L S A H R A L L T S N E T M R L P V P T H K N
Rattus    1  M-RMLLCLN V L T L S C -- V W A I A M E I P M S T V V K E T L I Q L S T H R A L L T S N E T M R L P V P T H K N
Acomys    1  M-RVLLHLSF L T L P C -- V W A V A M E I P M S A V V K E T L I Q L S A H R A L L T S N E T V R L P V P T H K N
```

```
Homo      60  H Q L C T E E I F Q G I G T L E S Q T V Q G G T V E R L F K N L S L I K K Y I D G Q K K C G E E R R R V N Q F L D Y L
Mus       59  H Q L C I G E I F Q G L D I L K N Q T V R G G T V E M L F Q N L S L I K K Y I D R Q E K C G E E R R R T R Q F L D Y L
Rattus    58  H Q L C I G E I F Q G L D I L K N Q T V R G G T V E I P F Q N L S L I K K Y I D G Q E K C G E E R R T R H F L D Y L
Acomys    58  H Q L C I A E I F Q G L D I L K N Q T A R G G T V E T L F Q N L S L I K K Y I D R Q E K C G E E R R R T R Q F L D Y L
```

```
Homo      120  Q E F L G V M N T E W I I E -
Mus       119  Q E F L G V M S T E W A M E G
Rattus    118  Q E F L G V M S T E W A M E V
Acomys    118  Q E F L G V I S T E W T M D G
```

## Supplemental Figure 1f

### IL-6

---

#### MAFFT Alignment

```
Homo 1 MNSEFSTSAFGPVAEFLGLLLVLPAAFP-APVPPGEDSKDVAAPHRQPLTSSERIDKQIRY
Mus 1 MKFLSARDFHPVAEFLGLMLVTTAFPTSQVRRGDF-TEDTTPNRPVYTTS-QVGGLITH
Rattus 1 MKFLSARDEQPVAEFLGLMLITATAFPTSQVRRGDF-TEDTTHNRPVYTTS-QVGGLITY
Acomys 1 MKFLSARDLHPVIVF-LGLMLVTAAPFPTSQVRRGDLATADTTNRPVYTTSQQVGGLVTN
```

```
Homo 60 ILDGLISAIRKETCNKSNMCESSKFLALAENNLNLPKMAEKDGCFOSGFNEETCLVKIITGL
Mus 58 VLWEIVEMRKELCNGNSDCMNNDDALAENNLKLPFIQRNDGCVQTGYNQEICLLKISSGL
Rattus 58 VLREIILEMRKELCNGNSDCMNSDDALSENNLKLPFIQRNDGCFOTGYNQEICLLKICSGL
Acomys 60 VLKEVLEMRKELCNGSSDCMNNEDALSENRLNFPVIQINDGCFETKHDWEICLLKIISGL
```

```
Homo 120 LEFEVYLEYLQNRFE-SSEEQARAVQMSTKVLIQFLOKKAKNLDAITTPDPTTNASLLTK
Mus 118 LEYHSYLEYMKNNLKDNKKDKARVLRDTEHLIHFNQEVKDLHKIVLPTPTSNALLTDK
Rattus 118 LEERFYLEFVKNNLQDNKKDKARVIQSNTETLVHIFKQEIKDSYKIVLPTPTSNALLMEK
Acomys 120 LEVEIYLEYVKNNIQDSKKEKARVIQISTQALINILRQEVKEPGKIISPGETSTALQMET
```

```
Homo 179 LQAQNOWLQDMTTHLILRSFKEFLQSSIRALROM
Mus 178 LESQKEWLRTKTIQFILKSLEEFKVTLRSTRQT
Rattus 178 LESQKEWLRTKTIQLILKALEEFKVTMRSTRQT
Acomys 180 LKPNQEWLRTKITQLILKALEEFKDTMRSTRKS
```

## Supplemental Figure 1g

### IL-10

---

#### MAFFT Alignment

```
Homo      1  MHSALLCCLVLLTGVRASPGQGTQSENSCTHFPGNLPNMLRLRDAFSRVKTFQMKDQ
Mus       1  MPGSALLCCLLLLTVRIRSRGQYSREDNNCTHFPVGGQSHMLLELRTAFSQVKTFQTKDQ
Rattus   1  MPGSALLCCLLLLTVRIRSRGQYSREDNNCTHFPVVSQTHMLRELRAAFSQVKTFQKKDQ
Acomys   1  MPGSALLCCLLLLTVRIRSRG-----EYNCCTHFAVSQTHMLRELRAAFSQVKTFQKRQDQ
```

```
Homo      61  LDNILLKESLIEDFKGYLGCQALSEMIQFYLEEVMPQAENQDPDIKAHVNSLGENLKTLR
Mus       61  LDNILLTDSLMDQDFKGYLGCQALSEMIQFYLVEVMPQAEKHGPEIKEHLNSLGEKLTLR
Rattus   61  LDNILLTDSLMDQDFKGYLGCQALSEMIKFYLVEVMPQAENHGPEIKEHLNSLGEKLTW
Acomys   56  LDNILLTDSLMDQDFKGYLGCQALSEMIKFYLEEVMPQAENHGPEIKEHLNSLGEKLTLR
```

```
Homo      121  LRLRRCHRFLPCENKSKAVEQVKNAFNKLQEKGYKAMSEFDIFINYIEAYMTMKIRN
Mus       121  MRLRRCHRFLPCENKSKAVEQVKSDFNKLQDQGVYKAMNEFDIFINCIEAYMMIKMKS
Rattus   121  LRLRRCHRFLPCENKSKAVEQVKNDFNKLQDQGVYKAMNEFDIFINCIEAYMTMKMKN
Acomys   116  MRLRRCHRFLPCENKSKAVEQVKSDFNKLQEKGVYKAMSEFDIFINCIEAYMTIKMKN
```

## Supplemental Figure 1h

### IL-12p35

#### MAFFT Alignment

```
Homo      1  MWPPGSASQPPPSPAAAATGLHPAARPVSLQCRLSMCPARSLLLVATLVLLDHLSLARNLP
Mus       1  M-----VSVPTASPSASS-----SSQCRSSMCQSRYLFLATLALLNHLSLARVIP
Rattus   1  -----MCQSRYLFLATLVLLNHLTSARVIP
Acomys   1  -----MCQSRRLFLA-IVVLTLYLSLARANP

Homo     61  V-ATPDPGMFPCLLHSONLLRAVSNMLQKARQTFEYFPTSEEDIDHEDITKDKTSTVEAC
Mus      48  V-SGP----ARCLSQSRNLLKTTDDMVKTAREKCLKHYSCTAEDIDHEDITRDQSTLKTCL
Rattus  27  V-SGP----AKCLNQSQNLLKTTDDMVRTAREKCLKHYSCTAGDIDHEDITRDKTSTLEAC
Acomys  26  VHHP----AQCLHHAQNLLKATDNMMKTAREKLRHYSCTPGDIDHEDITRDKTSTLKAC

Homo    120  LPLELTKNESCLNSRETSFITNGSCLASRKTSFMALCLS SIYEDLKMYQVEEKTMAKLL
Mus     103  LPLELHKNESCLATRETSSTTRGSCLPQKTSMMTLCLGSIYEDLKMYQTEFQAINAAL
Rattus  82  LPLELHKNESCLATRETSSIIIRGSCLPQKTSMMTLCLGSIYEDLKMYQSEFQAINAAL
Acomys  82  LPLELAKNESCVATGETSSTIRGSCLPQKASWMMTLCLGSIYEDLKMYQTEFQAIKAEI

Homo    180  LMDPKRQIFLDQNMMLAVIDELMQALNFNSETVPOKSSLEEPDEFYKTKIKLKCILLHAFRIR
Mus     163  QNHNHQQIILDKGMLVAIDELMQSLNHNGETLRQKPPVGEADPYRVKMKLKCILLHAFSTR
Rattus  142  QSHNHQQITLDRNMLMAIDELMRSLNHSGETLRQKAPMGEADPYRVKMKLKCILLHAFSTR
Acomys  142  QSHNQQQITLREDMLAAIKELMRTILNPNGETPSPQTPAPERADPYKVKIKLKCILLHAFSIR

Homo    240  AVTIDRVMSYLNAS
Mus     223  VVTINRVMGYLSSA
Rattus  202  VMTINRVMNYLSSS
Acomys  202  VTTINKVMSYLNSS
```

## Supplemental Figure 1i

### IL-12p40

#### MAFFT Alignment

```
Homo      1  MCHQQLVVISWFESLVFLASPLVAIWELKKDVYVVELDWYPDAPGEMVVLTCDTPEEDGITW
Mus       1  MCPQKLTISWFALVLLVSPLMAIWELEKDVYVVEVDWTPDAPGETVNLTCDTPEEDDITW
Rattus   1  MCHQKLTFSWFAMVLLVSPLMAIWELEKDVYVVEVDWRPDAPGETVTLTCDSPPEEDDITW
Acomys   1  MCHQKLTISWFAMVLLASPLMAIWELEKDVYVVEVDWSPGAPGESVALTCDTPEEDDITW

Homo     61  TLDQSSSEVIGSGKTLTIQVKEFGDAGQYTCHKGGEVLSHSLLLLHKKEDGIWSTDILKDQ
Mus      61  TSDQRHGVIGSGKTLTITVKEFLDAGQYTCHKGGETLSHSHLLLHKKENGIWSTEILKN-
Rattus  61  TSDQRHGVIGSGKTLTITVREFLDAGQYTCHFGGETLSHSHLLLHKKENGIWSTEILKN-
Acomys  61  TSDQRIDFKESGKTVTFEVKEFIHAGQYTCHKGDETLHSRLLLHKKENGIWSTDILKD-

Homo    121  KEPKNTFLRCEAKNYSGRFTCWLLTTISTDLTFESVKSSRGSSDPQCVTCGAAILSAERV
Mus     120  --FKNKTFLKCEAPNYSGRFTCSWLVRNMDLKENIKSSSSPDSRAVTCGMASLSAEKV
Rattus  120  --FKNKTFLKCEAPNYSGRFTCSWLVRNMDLKENIKSSSSPDSRAVTCGRASLSAEKV
Acomys  120  --SKNKTFLRCEAPNYSGRFTCSWLAER-TDLKFSIKSGSSSPDSRAVTCGAASLSSEKV

Homo    181  RGDNKEYE-YSVECQEDSACPAAEESLPIEVMVDAVHKLKYENYTSFFFIRDI IKPDPK
Mus     178  TLDQRDYEKYSVSCQEDVTCPTAEETLPIELALEARQONKYENYSTSFFFIRDI IKPDPK
Rattus  178  TLNQRDYEKYSVACQEDVTCPTAEETLPIELVVEAQONKYENYSTSFFFIRDI IKPDPK
Acomys  177  RVDEQDEEQYSVSCQEDVACPTAEETLPIELVLDAQEQONKYENYSTSFFFIRDI IKPDPK

Homo    240  NLQVKPLKNSRQVEVSWEYDPDIWSTPHSYFSLTFVQVQVQKSKREK-----
Mus     238  NLQVKPLKNS-QVEVSWEYPDSDWSTPHSYFSLKFFVRIQRKKEKMK-----ETEEGC
Rattus  238  NLQVKPLKNS-QVEVSWEYPDSDWSTPHSYFSLKFFVRIQRKKEKTK-----ETEEEC
Acomys  237  NVQVKPLKND-EVEVSWEYPDSDWSTPHSYFSLKFFVQIQCNKEKTKKKRKKTEVEIERKC

Homo    286  --KDRVFTDKTSATVVICRKNASTSVRAQDRYYSSSWSEWASVPCS-----
Mus     289  NQKGAFLEKTSSTEVQC-KGCNVCVQAQDRYYNSSCSKWACVPCRVR-----
Rattus  289  NQKGAFLEKTSAEVQC-KGANICVQAQDRYYNSSCSKWT CVPCRGR-----
Acomys  296  KQKEPFLVDKTSATVEEC-KGAKVCVQAQDRYYNSSFSKWE CVPCKIQSQDATLEGKEVED

Homo    -----
Mus     -----
Rattus  -----
Acomys  355  NRKEKFHLMMEETPKAIFCLA AFFQLGSG
```



## Supplemental Figure 1j

### IL-17

---

#### MAFFT Alignment

```
Homo 1 MIPGKTSLVSV--LLLLLSLEATVKAGITIPRNPGCPNSEDKNEPRTVMVNLNTHNR-NTN
Mus 1 MSPGRASSVSLMLLLLLSLAATVKAAPAIIPQSSACPNTTEAKDFLQNVKVNLIKVNSLGAK
Rattus 1 MSPRRIPSMCLMLLLLLNLEATVKAAVLIIPQSSVCPNAEANNFLQNVKVNLIKVNSLSSK
Acomys 1 MSLGKTSVSLVLLLLLSLEAAVNAGTLVPOGTVCPNTDTKSFLODKVNLIKVNSFSR
```

```
Homo 58 TNPKRSSDYYNRSTSPWNLHRNEDPERYPSVIWEAKCRHLGCTNADGNVDYHMNSVPIQQ
Mus 61 VSSRRPSDYLNLRSTSPWTLHRNEDPDYPSVIWEAQCRHQRCVNAEGKLDHMHNSVLIQQ
Rattus 61 ASSRRPSDYLNLRSTSPWTLNRNEDPDYPSVIWEAQCRHQRCVNAEGKLDHMHNSVLIQQ
Acomys 61 VNSRRPSDYLNLRSTSPWTLHRNEDPDYPPVIWEARCRHQRCVNAEGKLDHMHNSVLIQQ
```

```
Homo 118 EILVLRREPPHCPNSFRLEKILVSVGCTCVTEPTVHHVA
Mus 121 EILVLKREPESCPFTFRVEKMLVGVGCTCVASIVRQAA
Rattus 121 EILVLKREPEKCPFTFRVEKMLVGVGCTCVSSIVRHAS
Acomys 121 EILVLRREAEEKCPFSFRLEKMLVGVGCTCVSSIVRHVA
```

## Supplemental Figure 1k

### CCL2

---

#### MAFFT Alignment

```
Homo      1 MKVSAVLLCLLLMTAAFNPQGLAQPDAENVPSSTCCFTFSSKKIISLQRLKSYV-ITISRCP
Mus       1 MQVPVMLLGLLETVAGWSIHVLAQPDVAVNAPLTCCYSFTSKMIPMSRLESYKRITSSRCP
Rattus    1 MQVSVTLLGLLETVAAACSIHVLSQPDAVAVNAPLTCCYSFTGKMIPLMSRLENYKRITSSRCP
Acomys    1 MQVSAKLLCLLLTAAASSSPMLAQPDSVTSPTTCCYSFTSKRIPLQRLLESYKRITSSKCP
```

```
Homo      60 QKAVIFRTKLGKEICADPKKEWVQNYMKHLGRK-----AHTLKT-----
Mus       61 KEAVVFVTKLKRKVCADPKKEWVQIYIKNLDNRNQRSEPTTIFKTASALRSSAPLN-VKL
Rattus    61 KEAVVFVTKLKRKICADPNKEWVQKYIRKLDQNRSETTVFYKIASTLRTSAPLN-VNL
Acomys    61 KEAIIFVTKLKRKICADPTMDWVQSYIQKLDQNRKSEATAVEKTASSPGSSASLNAAANS
```

```
Homo      -----
Mus       120 TRKSEANAST-IFSTTTSSSTSVGVTSVTVN
Rattus    120 THKSEANAST-IFSTTTSSSTSVGVTSMTEN
Acomys    121 THKPSANASTATFPTATSSSTSVGVTSVTVN
```

## Supplemental Figure 11

### CCL3

---

#### MAFFT Alignment

```
Homo      1  MQVSTAALAVLLCTMALCNQVLSAPLAADTPTACCFSTSRQIPQNFIAADYFETSSQCSK
Mus       1  MKVSTTALAVLLCTMTLCNQVFSAPYGADTPTACCFSY-SRRIPRQFIVDYFETSSLCSQ
Rattus    1  MKVSTAALAVLLCTMALWNEVFSAPYGADTPTACCFSY-GRQIPRKFIAADYFETSSLCSQ
Acomys    1  MKVPTAALAVLLCTMALCNQVFSAPYGADTPTACCFSY-SRQIPRKFIVDYFETSSLCSQ
```

```
Homo      61  PSVIFLTKRGROWCADPSEEWVQKYVSDLELSA
Mus       60  PGVIFLTKRNRQICADSKETWVQYITDLELNA
Rattus    60  PGVIFLTKRNRQICADPKETWVQYITDLELNA
Acomys    60  PGVIFLTKRNRQICADPKETWVQYITDLELNA
```

## Supplemental Figure 1m

### CCL5

---

#### MAFFT Alignment

```
Homo      1 MKVS-AAALAVILTATALCAPASASPYSDDTTPCCFAYIARELPRAHIKEYFYTSGKCSN
Mus       1 MKIS-AAALTIIILTAAALCTPAPASPYGSDTTPCCFAYLSLALPRAHVKEYFYTSSKCSN
Rattus    1 MKISTAASLTVILVAAALCTPAPASPYGSDTTPCCFAYLSLALPRAHVKEYFYTSSKCSN
Acomys    1 MKIS-AAALAVIVTAAATCAPASASPYGSDTAPCCFAYHSRVLPRDHVKEYFYTSSKCSN
```

```
Homo      60 PAVVFVTRKNRQVCANPEKKWVREYINSLEMS
Mus       60 LAVVFVTRRNQVCANPEKKWVQEYINYLEMS
Rattus    61 LAVVFVTRRNQVCANPEKKWVQEYINYLEMS
Acomys    60 LAVIFVTRRNQVCANPEKKWVRKYINYLEMK
```

## Supplemental Figure 1n

### CSF2

---

#### MAFFT Alignment

```
Homo      1  MWLQSLLLLGTVACSI SAPARSPSPSTQPWEHVNATQEARLLNLSRDTAA---EMNETV
Mus       1  MWLQNLFLFLGIVVYSL SAPTRSP  TVTRPWKHVEAIKEALNLLD---DMPV---TLNEEV
Rattus   1  MWLQNLFLFLGIVVY SFSAPTRSPNPVTRPWKHVD AIKEALSLLN---DMRALENEKNEVDV
Acomys   1  MWLQSLFLSIVVCSFSAPTRSP  PVTRPWKHVD AIEALSLLN---EMPV---TVTENV
```

```
Homo      58  EVI SEMFDIQEPTCLQTRLELYKQGLRGSITKCLKGPLTMMASHYKQHC PPTPETS CATQI
Mus       55  EVV SNEFSFKKLTVCVQTRLKTFEQGLRGNFTKCLKGALNMTASYYQTYC PPTPETDCETQV
Rattus   58  DII SNEFSIQRP TCVQTRLKLYKQGLRGNLT KLN GALTMIASHYQTNC PPTPETDCEIEV
Acomys   55  GVV SNDFSIQNPTCVQTRLDLYKQGLRGNFT RLEGDLTVIASHYKKNCPPTPETNCESQV
```

```
Homo      118  ITT E S F K E N L K D F L L V I P F D C W E P V Q E
Mus       115  T T Y A D F I D S L K T F L T D I P F E C K K P G Q K
Rattus   118  T T E D F I K N L K G F L F D I P F D C W K P V Q K
Acomys   115  I I Y E E F I E N L K G F L M V I P F D C W K S A Q K
```

## Supplemental Figure 1o

### IFN $\gamma$

---

#### MAFFT Alignment

```
Homo 1 MKYTSYILAFQLCLVLSLGCYCDPYVKEAENLKKYFNAGHSDVADNGTLEFLGILKNWK
Mus 1 MNATHCILALQLFLMAVS-GCYCHGTVIESLESLNNYFNSSGID-VEEKSLFLDIWRNWQ
Rattus 1 MSATRRVLVLQLCLMAIS-GCYCQGTIIESLESLKNYFNSSMDAMEGKSLLLDIWRNWQ
Acomys 1 MNAKHCILALQLFLMAIY-GCYCQGTVIEETTNLKEYF-ASSISVSNGEDLLLHILRNWQ
```

```
Homo 61 EESDRKIMQSQIVSFYFKLFKNEKDDQSIQKSVETIKEDMNVKFFNSNKKKDFDFEKLTN
Mus 59 KDGDMKILQSQIISFYLRRLFVLDKDNQAISNNISVIESHLITTFNSNSKAKKDAFMSIAK
Rattus 60 KDGNTKILESQIISFYLRRLFVLDKDNQAISNNISVIESHLITNFFNSNSKAKKDAFMSIAK
Acomys 59 QDGDTKTIDIQIISFYFKLFEALKGHKAIQRSIDTIRADLIANFFNNSEEKYNCFMRIA
```

```
Homo 121 YSVTDLNVQRKAIHELIQVMAELSPAAGTKRKRKRSQMLF-----RGRRASQ
Mus 119 FEVNNPQVQRQAFNELIRVVHQLLPESLRKRKRKRSRC-----
Rattus 120 FEVNNPQIQHKANVELIRVIHQLSPESSLRKRKRKRSRC-----
Acomys 119 IEVNDPQNQRKAINELVTVMSHLSPKSKQRKRKRKRSRC CFGAGDRLNKNNPASTI
```

## Supplemental Figure 1p

### TNF $\alpha$

---

#### MAFFT Alignment

```
Homo      1  MSTESMIRDVELAEEALPKKTGGPQGSRRCLFSLFSFLIVAGATTLFCLLHFGVIGPQR
Mus       1  MSTESMIRDVELAEEALPQKMGGFQNSRRCLCCLSLFSFLLVAGATTLFCLLNFGVIGPQR
Rattus   1  MSTESMIRDVELAEEALPKKMGGIQNSRRCLCCLSLFSFLLVAGATTLFCLLNFGVIGPNK
Acomys   1  MSTESMIRDVELAEEALPQKAGSPQNSRRCLCCLSLFSFLLVAGATLFLCLLNFGVIGPQR

Homo     61  EE-FPRDLSLISPLAQ--AVRSSSRTPSDKPVAVHVVANPQAEGLQWLNRANALLANGV
Mus      61  DEKFPNGLPLISSMAQTTLRSSSQNSDDKPVAVHVVANHQVEEQLEWLSQRANALLANGM
Rattus   61  EEKFPNGLPLISSMAQTTLRSSSQNSDDKPVAVHVVANHQAEQLEWLSQRANALLANGM
Acomys   61  EEKFPNGLPLIIGSMAQTTLRSSSQNSDDKPVAVHVVANHQVEEQLEWLSQRANALLANGM

Homo    118  ELFDNQLVVPSEGLYLIYSQVLFKGGQCPSTHVLLTHTISRIVSYQTKVNLLSAIKSPC
Mus     121  DLKDNQLVVPADGLYLIYSQVLFKGGQCPD-YVLLTHTVSRFAISYQEKVNLLSAIKSPC
Rattus  121  DLKDNQLVVPADGLYLIYSQVLFKGGQCPD-YVLLTHTVSRFAISYQEKVSLLSAIAIKSPC
Acomys  121  DLKDNQLVVPSSDGLYLIYSQVLFKGGQCPN-YVLLTHTVSRFAMSYEDKVNLLSAIKSPC

Homo    178  QRETPEGAEAKPWYEPYIYLGGVFQLEKGDRLSAEINRPDYLDFAESGQVYFGIAL
Mus     180  PKDTPEGAEALKPWYEPYIYLGGVFQLEKGDQLSAEVNLPKYLDFAESGQVYFGVIAL
Rattus  180  PKDTPEGAEALKPWYEPYIYLGGVFQLEKGDQLLSAEVNLPKYLDITTESGQVYFGVIAL
Acomys  180  PKDTPEGAEALKPWYEPYIYLGGVFQLEKGDRLSAEVNLPKYLDFAESGQVYFGVIAL
```

## Supplemental Figure 1q

### CXCL1

---

#### MAFFT Alignment

```
Homo      1  MARATLSAAPSNPRLLRVALLLLLVAASRRAGAPLATELRCQCLQTLQGIHLKNIQSV
Mus       1  M-----IPATRSLLCAA---LLLATSRLATGAPIANELRCQCLQTMAGIHLKNIQSL
Rattus   1  M-----VSATRSLLCAA---LPVLATSRQATGAPVANELRCQCLQTVAGIHFKNIQSL
Acomys   1  M-----APATSPLLRGTLLLLLLLATSPQATGAPVASELRCQCLQTVAGIHLKNIQSL
```

```
Homo      61  KVKSPGPHCAQTEVIATLKNGQKACLNPASPMVKKIIEKMLKNGKSN
Mus       51  KVLPSGPHCTQTEVIATLKNGREACLDPEAPVQKIVQKMLK-GVPK
Rattus   51  KVMPPGPHCTQTEVIATLKNGREACLDPEAPMVQKIVQKMLK-GVPK
Acomys   54  KVTPPGPHCIQTEVIATLKNGREACLDPEAPMVRKIVQKMLN-GISK
```
